# Supplementary material for: Gut and Colony Microbiota of Honey Bees: Social Immunity and Opportunism Overwinter
Source: Research Square preprint supplement (doi:10.21203/rs.3.rs-1078138/v1), 2021-11-30
Supplement: Supplementary file 1 [file 453c2f3445ea625e47ddd04d.xlsx]

## Sheet: Correlation summary
Anderson and Maes 2021, Gut and Colony Microbiota of Honey Bees: Social Immunity and Opportunism Overwinter
Table S4. Correlations of gene expression in the HPG with microbiota abundance and metrics
KA samples								WW and CW samples
Correlations† of diutinus HPG immune gene expression with microbial abundance and metrics.								Correlations† of HPG immune gene expression with microbial abundance and metrics.
Gene	Known Age Mouthparts			Known Age Midguts				Category WW Midgut				CW Midgut
	Dependent variable	Rs	p	Dependent variable	Rs	p		Gene	Dependent variable	Rs	p	Dependent variable	Rs	p
Nutritional State								Nutritional State
Vitellogenin	No strong associations			No strong associations				Vg	Bacterial Diversity	-0.59	0.005	Bacterial Diversity	0.05	0.81
Antimicrobial Peptides									Diversity Abundance	-0.61	0.003	Diversity abundance	-0.17	0.35
Abaecin	Actinomycetales	0.29	0.05	Nosema ceranae	-0.36	0.01			Fungal Abundance	-0.56	0.006	Fungal Abundance	0.03	0.87
	P. apium	-0.24	0.11	P. apium	-0.33	0.04			Actinomycetales	-0.54	0.01	Actinomycetales	-0.35	0.05
				Bacterial abundance	0.3	0.05		Antimicrobial Peptides
								Abaecin	Xanthomonadaceae	-0.47	0.01	Xanthomonadaceae	-0.05	0.79
Hymenoptacin	Actinomycetales	0.38	0.01	Nosema ceranae	-0.38	0.01			Enterobacteriaceae	0.45	0.01	Enterobacteriaceae*	N/A	N/A
Defensin-1	Lactobacillus kunkeei	-0.31	0.04	Lactobacillus kunkeei	-0.3	0.07		Hymen	Bacterial Diversity	-0.52	0.004	Bacterial Diversity	0.26	0.16
Oxidative State									Fungal Abundance	-0.48	0.007	Fungal Abundance	-0.08	0.67
GOX	Fungal abundance	-0.23	0.13	Snodgrassella alvi*	0.54	0.0004			Nosema ceranae	-0.48	0.007	Nosema ceranae	0.25	0.18
	Diversity abundance	-0.32	0.03	B. asteroides*	0.45	0.004			Actinomycetales	-0.39	0.04	Actinomycetales	-0.06	0.76
	Xanthomonadaceae	-0.37	0.01	Gilliamella apicola*	0.44	0.006
	P. apium	-0.14	0.33	Lactobacillus firm4*	0.33	0.04		Defensin	Bacterial Diversity	-0.23	0.22	Bacterial Diversity	0.51	0.005
	L. kunkeei	-0.11	0.44	Lactobacillus firm5*	0.3	0.07			Nosema ceranae	-0.4	0.02	Nosema ceranae	0.21	0.25
				Nosema ceranae	-0.4	0.007		Oxidative State
								GOX	Nosema ceranae	-0.43	0.02	Nosema ceranae	0.01	0.99
Cu/Zn	Fungal abundance	-0.48	0.0008	Core hindgut bacteria*	0.36	0.05			Bacterial Diversity	-0.37	0.05	Bacterial Diversity	0.28	0.15
SOD	Diversity abundance	-0.38	0.01	Snodgrassella alvi	0.53	0.0006			G. apicola	0.01	0.97	G. apicola	-0.37	0.04
	Xanthomonadaceae	-0.5	0.0004	Bacterial abundance	0.33	0.02			B. asteroides	0.34	0.07	B. asteroides	-0.39	0.03
	Enterobacteriaceae	-0.26	0.08	Enterobacteriaceae	0.32	0.05			Fungal Abundance	-0.26	0.15	Fungal Abundance	-0.4	0.03
	Actinomycetales	0.43	0.003	Nosema ceranae	-0.32	0.03			S. alvi	-0.03	0.87	S. alvi	-0.45	0.01
Mn SOD	Fungal abundance	-0.48	0.0008	Core hindgut bacteria*	0.38	0.05		MnSOD	P. apium	0.38	0.05	P. apium	0.09	0.63
	Diversity abundance	-0.41	0.004	Snodgrassella alvi	0.54	0.0004
	Xanthomonadaceae	-0.55	0.0001	Bacterial abundance	0.31	0.04		CuZnSOD	Nosema ceranae	-0.43	0.01	Nosema ceranae	-0.1	0.58
	Enterobacteriaceae	-0.26	0.08	Enterobacteriaceae	0.36	0.03
	Actinomycetales	0.52	0.0002	Nosema ceranae	-0.3	0.04		CAT	Bacterial Diversity	0.09	0.66	Bacterial Diversity	-0.39	0.04
								† Values depect change overwinter in midguts of WW and CW samples.
CAT	Diversity abundance^	0.23	0.11	Lactobacillus kunkeei	0.43	0.007		* Enterobacteriaceae occurred with low frequency and abundance in cold winter samples.
				Bacterial Diversity	0.34	0.04
				Lactobacillus Firm5	-0.38	0.02
† Spearmans correlations based on diutinus worker (KA) samples.
* Values for the core hindgut bacteria are averages based on five OTUs (phylotypes); S. alvi is one of the five.
^ Strongest detected relationship of mouth microbiota with Catalase expression

## Sheet: KA Correlations
Anderson and Maes 2021, Gut and Colony Microbiota of Honey Bees: Social Immunity and Opportunism Overwinter
Table S4: Correlations among dependent variables from the KA samples overwinter including 19, 33, 50 and 70 days of age.
The two columns on the right are a subset of those on the left, containing only strong and mild relationships ordered by p-value.
Lachnospiraceae and Serratia contained over 50% zero values and were omitted from the correlation analysis.
	KA Mouthparts						KA Midguts						KA Mouthparts					KA Midguts
	Variable	by Variable	Spearman ρ	Prob>|ρ|			Variable	by Variable	Spearman ρ	Prob>|ρ|			Variable	by Variable	Spearman ρ	Prob>|ρ|		Variable	by Variable	Spearman ρ	Prob>|ρ|
	Log 18s Copy#	Log 16s Copy#	-0.2342	0.1173			Log 18s Copy#	Log 16s Copy#	0.1145	0.4485			Lactobacillus Firm4	Lactobacillus Firm5	0.6162	0.0001		Diversity	Log 16s Copy#	-0.7117	0.0001
	Nosema ceranae	Log 16s Copy#	-0.1383	0.3593			Nosema ceranae	Log 16s Copy#	-0.1836	0.222			B. asteroides	Lactobacillus Firm5	0.6412	0.0001		Lactobacillus Firm4	Lactobacillus Firm5	0.6571	0.0001
	Nosema ceranae	Log 18s Copy#	0.2451	0.1006			Nosema ceranae	Log 18s Copy#	-0.0662	0.6622			B. asteroides	Lactobacillus Firm4	0.5531	0.0001		B. asteroides	Lactobacillus Firm5	0.6717	0.0001
	Diversity	Log 16s Copy#	-0.2202	0.1414			Diversity	Log 16s Copy#	-0.7117	0.0001			G. apicola	Lactobacillus Firm5	0.5846	0.0001		B. asteroides	Lactobacillus Firm4	0.6369	0.0001
	Diversity	Log 18s Copy#	0.2876	0.0526			Diversity	Log 18s Copy#	0.0813	0.6274			G. apicola	Lactobacillus Firm4	0.543	0.0001		S. alvi	Lactobacillus Firm5	0.6423	0.0001
	Lactobacillus Firm 5	Log 16s Copy#	0.2823	0.0574			Diversity	Nosema ceranae	-0.0327	0.8453			G. apicola	B. asteroides	0.6282	0.0001		S. alvi	B. asteroides	0.6579	0.0001
	Lactobacillus Firm 5	Log 18s Copy#	0.1117	0.4599			Lactobacillus Firm 5	Log 16s Copy#	0.2625	0.1113			G. apicola	S. alvi	0.5935	0.0001		G. apicola	Lactobacillus Firm5	0.5951	0.0001
	Lactobacillus Firm 5	Diversity	0.1491	0.3226			Lactobacillus Firm 5	Log 18s Copy#	0.2945	0.0727			P. apium	Log 16s Copy#	0.8128	0.0001		G. apicola	B. asteroides	0.5822	0.0001
	Lactobacillus Firm4	Log 16s Copy#	0.2332	0.1189			Lactobacillus Firm 5	Nosema ceranae	-0.2122	0.201			L. kunkeei	Log 16s Copy#	0.5398	0.0001		G. apicola	S. alvi	0.7588	0.0001
	Lactobacillus Firm4	Log 18s Copy#	0.1042	0.4909			Lactobacillus Firm 5	Diversity	-0.256	0.1208			L. kunkeei	P. apium	0.6167	0.0001		Gilliamella spp.	Log 16s Copy#	0.578	0.0001
	Lactobacillus Firm4	Diversity	0.2332	0.1189			Lactobacillus Firm4	Log 16s Copy#	0.5516	0.0003			Xanthomonadaceae	Enterobacteriaceae	0.5745	0.0001		L. kunkeei	P. apium	0.7037	0.0001
	Lactobacillus Firm4	Lactobacillus Firm5	0.6162	0.0001			Lactobacillus Firm4	Log 18s Copy#	0.2025	0.2226			Abaecin	Hymen	0.8699	0.0001		Actinomycetales	Diversity	0.611	0.0001
	B. asteroides	Log 16s Copy#	0.2365	0.1135			Lactobacillus Firm4	Nosema ceranae	-0.1319	0.4301			GOX	Hymen	0.5311	0.0001		Diversity abundance	Diversity	0.592	0.0001
	B. asteroides	Log 18s Copy#	0.1648	0.2736			Lactobacillus Firm4	Diversity	-0.3677	0.0232			GOX	Def-1	0.71	0.0001		Diversity abundance	Actinomycetales	0.7212	0.0001
	B. asteroides	Diversity	0.1279	0.3969			Lactobacillus Firm4	Lactobacillus Firm5	0.6571	0.0001			GOX	Abaecin	0.6717	0.0001		Abaecin	Hymen	0.8699	0.0001
	B. asteroides	Lactobacillus Firm5	0.6412	0.0001			B. asteroides	Log 16s Copy#	0.4028	0.0122			Cu/Zn Sod	Hymen	0.5309	0.0001		GOX	Hymen	0.5311	0.0001
	B. asteroides	Lactobacillus Firm4	0.5531	0.0001			B. asteroides	Log 18s Copy#	0.3848	0.017			Cu/Zn Sod	Abaecin	0.6441	0.0001		GOX	Def-1	0.71	0.0001
	S. alvi	Log 16s Copy#	0.3842	0.0084			B. asteroides	Nosema ceranae	-0.0605	0.7182			Cu/Zn Sod	GOX	0.693	0.0001		GOX	Abaecin	0.6717	0.0001
	S. alvi	Log 18s Copy#	0.0569	0.7071			B. asteroides	Diversity	-0.1911	0.2504			MnSod	Xanthomonadaceae	-0.5472	0.0001		Cu/Zn Sod	Age	0.7068	0.0001
	S. alvi	Diversity	0.0856	0.5717			B. asteroides	Lactobacillus Firm5	0.6717	0.0001			MnSod	Hymen	0.5362	0.0001		Cu/Zn Sod	Hymen	0.5309	0.0001
	S. alvi	Lactobacillus Firm5	0.3872	0.0078			B. asteroides	Lactobacillus Firm4	0.6369	0.0001			MnSod	Abaecin	0.6471	0.0001		Cu/Zn Sod	Abaecin	0.6441	0.0001
	S. alvi	Lactobacillus Firm4	0.4594	0.0013			S. alvi	Log 16s Copy#	0.5007	0.0014			MnSod	GOX	0.6362	0.0001		Cu/Zn Sod	GOX	0.693	0.0001
	S. alvi	B. asteroides	0.4702	0.001			S. alvi	Log 18s Copy#	0.3287	0.0439			MnSod	Cu/Zn Sod	0.9576	0.0001		MnSod	Age	0.7501	0.0001
	G. apicola	Log 16s Copy#	0.1086	0.4725			S. alvi	Nosema ceranae	-0.2818	0.0865			MnSod	Actinomycetales	0.5202	0.0002		MnSod	Hymen	0.5362	0.0001
	G. apicola	Log 18s Copy#	0.1196	0.4286			S. alvi	Diversity	-0.3097	0.0585			Cu/Zn Sod	Xanthomonadaceae	-0.5027	0.0004		MnSod	Abaecin	0.6471	0.0001
	G. apicola	Diversity	0.0715	0.6367			S. alvi	Lactobacillus Firm5	0.6423	0.0001			Cu/Zn Sod	Log 18s Copy#	-0.4752	0.0008		MnSod	GOX	0.6362	0.0001
	G. apicola	Lactobacillus Firm5	0.5846	0.0001			S. alvi	Lactobacillus Firm4	0.5033	0.0013			MnSod	Log 18s Copy#	-0.4791	0.0008		MnSod	Cu/Zn Sod	0.9576	0.0001
	G. apicola	Lactobacillus Firm4	0.543	0.0001			S. alvi	B. asteroides	0.6579	0.0001			S. alvi	B. asteroides	0.4702	0.001		Lactobacillus Firm4	Log 16s Copy#	0.5516	0.0003
	G. apicola	B. asteroides	0.6282	0.0001			G. apicola	Log 16s Copy#	0.4796	0.0023			S. alvi	Lactobacillus Firm4	0.4594	0.0013		GOX	S. alvi	0.5421	0.0004
	G. apicola	S. alvi	0.5935	0.0001			G. apicola	Log 18s Copy#	0.331	0.0424			Xanthomonadaceae	Log 18s Copy#	0.4448	0.002		MnSod	S. alvi	0.5418	0.0004
	Gilliamella spp.	Log 16s Copy#	0.3453	0.0188			G. apicola	Nosema ceranae	-0.2498	0.1304			Abaecin	Def-1	0.442	0.0021		Cu/Zn Sod	S. alvi	0.5291	0.0006
	Gilliamella spp.	Log 18s Copy#	-0.3656	0.0125			G. apicola	Diversity	-0.3801	0.0186			Cu/Zn Sod	Actinomycetales	0.4301	0.0029		S. alvi	Lactobacillus Firm4	0.5033	0.0013
	Gilliamella spp.	Diversity	-0.0706	0.6411			G. apicola	Lactobacillus Firm5	0.5951	0.0001			Diversity abundance	Log 18s Copy#	0.4157	0.0041		Diversity abundance	Delftia	0.5014	0.0013
	Gilliamella spp.	Lactobacillus Firm5	-0.0314	0.8359			G. apicola	Lactobacillus Firm4	0.4181	0.009			MnSod	Diversity abundance	-0.4131	0.0043		S. alvi	Log 16s Copy#	0.5007	0.0014
	Gilliamella spp.	Lactobacillus Firm4	0.1434	0.3418			G. apicola	B. asteroides	0.5822	0.0001			Xanthomonadaceae	Actinomycetales	-0.3954	0.0065		Abaecin	Def-1	0.442	0.0021
	Gilliamella spp.	B. asteroides	0.109	0.471			G. apicola	S. alvi	0.7588	0.0001			S. alvi	Lactobacillus Firm5	0.3872	0.0078		G. apicola	Log 16s Copy#	0.4796	0.0023
	Gilliamella spp.	S. alvi	0.327	0.0265			Gilliamella spp.	Log 16s Copy#	0.578	0.0001			S. alvi	Log 16s Copy#	0.3842	0.0084		Actinomycetales	L. kunkeei	0.4736	0.0027
	Gilliamella spp.	G. apicola	0.2065	0.1685			Gilliamella spp.	Log 18s Copy#	0.0056	0.9735			Hymen	Actinomycetales	0.3779	0.0096		Actinomycetales	P. apium	0.4698	0.0029
	P. apium	Log 16s Copy#	0.8128	0.0001			Gilliamella spp.	Nosema ceranae	0.0089	0.9579			Cu/Zn Sod	Diversity abundance	-0.3774	0.0097		GOX	B. asteroides	0.452	0.0044
	P. apium	Log 18s Copy#	-0.2648	0.0754			Gilliamella spp.	Diversity	-0.2371	0.1517			Delftia	Log 16s Copy#	-0.3753	0.0102		GOX	G. apicola	0.4411	0.0056
	P. apium	Diversity	-0.138	0.3603			Gilliamella spp.	Lactobacillus Firm5	-0.0828	0.6209			MnSod	Gilliamella spp.	0.3735	0.0106		GOX	Nosema ceranae	-0.3951	0.0066
	P. apium	Lactobacillus Firm5	0.0519	0.7321			Gilliamella spp.	Lactobacillus Firm4	0.2172	0.1901			Diversity abundance	Xanthomonadaceae	0.3663	0.0123		CAT	L. kunkeei	0.4287	0.0073
	P. apium	Lactobacillus Firm4	0.1314	0.384			Gilliamella spp.	B. asteroides	0.0036	0.9828			Gilliamella spp.	Log 18s Copy#	-0.3656	0.0125		G. apicola	Lactobacillus Firm4	0.4181	0.009
	P. apium	B. asteroides	0.0876	0.5625			Gilliamella spp.	S. alvi	0.0489	0.7705			GOX	Xanthomonadaceae	-0.3655	0.0125		Hymen	Nosema ceranae	-0.3786	0.0095
	P. apium	S. alvi	0.3274	0.0263			Gilliamella spp.	G. apicola	0.0551	0.7427			Xanthomonadaceae	Diversity	0.3628	0.0132		Hymen	Age	0.373	0.0107
	P. apium	G. apicola	-0.0662	0.6622			P. apium	Log 16s Copy#	-0.0962	0.5655			Diversity abundance	Diversity	0.3607	0.0138		GOX	Age	0.3694	0.0115
	P. apium	Gilliamella spp.	0.2733	0.0661			P. apium	Log 18s Copy#	0.2014	0.2252			Diversity abundance	Enterobacteriaceae	0.3494	0.0173		Diversity abundance	P. apium	0.4033	0.012
	L. kunkeei	Log 16s Copy#	0.5398	0.0001			P. apium	Nosema ceranae	-0.1072	0.5219			Xanthomonadaceae	Log 16s Copy#	-0.3476	0.0179		B. asteroides	Log 16s Copy#	0.4028	0.0122
	L. kunkeei	Log 18s Copy#	-0.2611	0.0797			P. apium	Diversity	0.3386	0.0376			Xanthomonadaceae	Gilliamella spp.	-0.3454	0.0187		Enterobacteriaceae	S. alvi	0.4013	0.0125
	L. kunkeei	Diversity	-0.1216	0.421			P. apium	Lactobacillus Firm5	0.1025	0.5404			Gilliamella spp.	Log 16s Copy#	0.3453	0.0188		MnSod	G. apicola	0.3975	0.0135
	L. kunkeei	Lactobacillus Firm5	0.0382	0.8011			P. apium	Lactobacillus Firm4	-0.0555	0.7406			Diversity abundance	Actinomycetales	-0.3442	0.0192		Abaecin	Nosema ceranae	-0.36	0.014
	L. kunkeei	Lactobacillus Firm4	0.1128	0.4555			P. apium	B. asteroides	0.1225	0.4637			Actinomycetales	Lactobacillus Firm5	-0.343	0.0196		Abaecin	Age	0.3582	0.0145
	L. kunkeei	B. asteroides	-0.1911	0.2033			P. apium	S. alvi	0.1106	0.5086			Vg	Cu/Zn Sod	0.3429	0.0211		Diversity abundance	Log 18s Copy#	0.3904	0.0154
	L. kunkeei	S. alvi	0.1255	0.4059			P. apium	G. apicola	0.2268	0.1708			Actinomycetales	Gilliamella spp.	0.3351	0.0228		MnSod	Lactobacillus Firm5	0.3882	0.016
	L. kunkeei	G. apicola	-0.162	0.2821			P. apium	Gilliamella spp.	-0.1624	0.33			P. apium	S. alvi	0.3274	0.0263		B. asteroides	Log 18s Copy#	0.3848	0.017
	L. kunkeei	Gilliamella spp.	0.0515	0.734			L. kunkeei	Log 16s Copy#	-0.0809	0.629			Gilliamella spp.	S. alvi	0.327	0.0265		G. apicola	Diversity	-0.3801	0.0186
	L. kunkeei	P. apium	0.6167	0.0001			L. kunkeei	Log 18s Copy#	0.0537	0.749			Cu/Zn Sod	Def-1	0.3262	0.0269		CAT	Lactobacillus Firm5	-0.3786	0.0191
	Enterobacteriaceae	Log 16s Copy#	-0.0561	0.7114			L. kunkeei	Nosema ceranae	-0.0382	0.8199			GOX	Diversity abundance	-0.3228	0.0286		Enterobacteriaceae	Log 16s Copy#	0.3779	0.0193
	Enterobacteriaceae	Log 18s Copy#	0.1943	0.1956			L. kunkeei	Diversity	0.3671	0.0234			Actinomycetales	Lactobacillus Firm4	-0.3226	0.0288		Cu/Zn Sod	B. asteroides	0.3749	0.0204
	Enterobacteriaceae	Diversity	0.2857	0.0542			L. kunkeei	Lactobacillus Firm5	0.035	0.8347			Delftia	P. apium	-0.3222	0.029		Vg	Cu/Zn Sod	0.3429	0.0211
	Enterobacteriaceae	Lactobacillus Firm5	0.1615	0.2836			L. kunkeei	Lactobacillus Firm4	-0.0462	0.7832			Xanthomonadaceae	P. apium	-0.3208	0.0298		Xanthomonadaceae	Diversity	0.3714	0.0217
	Enterobacteriaceae	Lactobacillus Firm4	0.1234	0.4139			L. kunkeei	B. asteroides	0.1271	0.447			Vg	MnSod	0.3209	0.0316		Lactobacillus Firm4	Diversity	-0.3677	0.0232
	Enterobacteriaceae	B. asteroides	0.2884	0.0519			L. kunkeei	S. alvi	0.1551	0.3526			Def-1	L. kunkeei	-0.3066	0.0382		L. kunkeei	Diversity	0.3671	0.0234
	Enterobacteriaceae	S. alvi	0.1911	0.2033			L. kunkeei	G. apicola	0.0999	0.5505			Enterobacteriaceae	B. asteroides	0.2884	0.0519		Cu/Zn Sod	Log 16s Copy#	0.3311	0.0246
	Enterobacteriaceae	G. apicola	0.2347	0.1165			L. kunkeei	Gilliamella spp.	-0.1567	0.3474			Def-1	Hymen	0.2884	0.0519		Cu/Zn Sod	Def-1	0.3262	0.0269
	Enterobacteriaceae	Gilliamella spp.	-0.0395	0.7942			L. kunkeei	P. apium	0.7037	0.0001			Abaecin	Actinomycetales	0.2883	0.052		MnSod	Enterobacteriaceae	0.3583	0.0272
	Enterobacteriaceae	P. apium	-0.0772	0.6103			Enterobacteriaceae	Log 16s Copy#	0.3779	0.0193								Cu/Zn Sod	Nosema ceranae	-0.3191	0.0307
	Enterobacteriaceae	L. kunkeei	-0.0273	0.857			Enterobacteriaceae	Log 18s Copy#	0.2989	0.0683								Vg	MnSod	0.3209	0.0316
	Actinomycetales	Log 16s Copy#	0.1822	0.2254			Enterobacteriaceae	Nosema ceranae	0.1496	0.37								Delftia	Actinomycetales	0.3416	0.0358
	Actinomycetales	Log 18s Copy#	-0.2777	0.0617			Enterobacteriaceae	Diversity	-0.2143	0.1963								P. apium	Diversity	0.3386	0.0376
	Actinomycetales	Diversity	0.074	0.6251			Enterobacteriaceae	Lactobacillus Firm5	0.1806	0.278								MnSod	Log 16s Copy#	0.3064	0.0383
	Actinomycetales	Lactobacillus Firm5	-0.343	0.0196			Enterobacteriaceae	Lactobacillus Firm4	0.2499	0.1302								CAT	Diversity	0.3359	0.0393
	Actinomycetales	Lactobacillus Firm4	-0.3226	0.0288			Enterobacteriaceae	B. asteroides	0.2012	0.2258								Abaecin	P. apium	-0.3337	0.0406
	Actinomycetales	B. asteroides	-0.2877	0.0525			Enterobacteriaceae	S. alvi	0.4013	0.0125								G. apicola	Log 18s Copy#	0.331	0.0424
	Actinomycetales	S. alvi	-0.0568	0.7077			Enterobacteriaceae	G. apicola	0.3131	0.0556								GOX	Lactobacillus Firm4	0.331	0.0424
	Actinomycetales	G. apicola	-0.187	0.2132			Enterobacteriaceae	Gilliamella spp.	0.3187	0.0512								S. alvi	Log 18s Copy#	0.3287	0.0439
	Actinomycetales	Gilliamella spp.	0.3351	0.0228			Enterobacteriaceae	P. apium	-0.084	0.616								MnSod	Nosema ceranae	-0.2983	0.044
	Actinomycetales	P. apium	0.1856	0.2169			Enterobacteriaceae	L. kunkeei	-0.0915	0.5849								Cu/Zn Sod	Lactobacillus Firm5	0.328	0.0444
	Actinomycetales	L. kunkeei	-0.0101	0.9471			Actinomycetales	Log 16s Copy#	-0.2657	0.107								MnSod	B. asteroides	0.3279	0.0445
	Actinomycetales	Enterobacteriaceae	-0.2074	0.1667			Actinomycetales	Log 18s Copy#	0.1924	0.2472								Abaecin	Log 16s Copy#	0.2953	0.0463
	Xanthomonadaceae	Log 16s Copy#	-0.3476	0.0179			Actinomycetales	Nosema ceranae	0.0859	0.6082								Cu/Zn Sod	Enterobacteriaceae	0.3226	0.0483
	Xanthomonadaceae	Log 18s Copy#	0.4448	0.002			Actinomycetales	Diversity	0.611	0.0001
	Xanthomonadaceae	Diversity	0.3628	0.0132			Actinomycetales	Lactobacillus Firm5	0.0682	0.684
	Xanthomonadaceae	Lactobacillus Firm5	0.178	0.2365			Actinomycetales	Lactobacillus Firm4	-0.1044	0.5327
	Xanthomonadaceae	Lactobacillus Firm4	0.0852	0.5736			Actinomycetales	B. asteroides	0.1623	0.3304
	Xanthomonadaceae	B. asteroides	0.2809	0.0586			Actinomycetales	S. alvi	0.0948	0.5712
	Xanthomonadaceae	S. alvi	-0.081	0.5927			Actinomycetales	G. apicola	0.0758	0.651
	Xanthomonadaceae	G. apicola	0.1202	0.4262			Actinomycetales	Gilliamella spp.	-0.1085	0.5169
	Xanthomonadaceae	Gilliamella spp.	-0.3454	0.0187			Actinomycetales	P. apium	0.4698	0.0029
	Xanthomonadaceae	P. apium	-0.3208	0.0298			Actinomycetales	L. kunkeei	0.4736	0.0027
	Xanthomonadaceae	L. kunkeei	-0.2364	0.1137			Actinomycetales	Enterobacteriaceae	-0.0133	0.9367
	Xanthomonadaceae	Enterobacteriaceae	0.5745	0.0001			Xanthomonadaceae	Log 16s Copy#	-0.2262	0.172
	Xanthomonadaceae	Actinomycetales	-0.3954	0.0065			Xanthomonadaceae	Log 18s Copy#	0.2661	0.1064
	Delftia	Log 16s Copy#	-0.3753	0.0102			Xanthomonadaceae	Nosema ceranae	0.1166	0.4859
	Delftia	Log 18s Copy#	0.0406	0.7886			Xanthomonadaceae	Diversity	0.3714	0.0217
	Delftia	Diversity	0.0215	0.8874			Xanthomonadaceae	Lactobacillus Firm5	-0.177	0.2878
	Delftia	Lactobacillus Firm5	0.2233	0.1358			Xanthomonadaceae	Lactobacillus Firm4	-0.1428	0.3923
	Delftia	Lactobacillus Firm4	0.0267	0.8602			Xanthomonadaceae	B. asteroides	-0.0879	0.5998
	Delftia	B. asteroides	0.0651	0.6675			Xanthomonadaceae	S. alvi	-0.131	0.4329
	Delftia	S. alvi	-0.1998	0.1832			Xanthomonadaceae	G. apicola	-0.1586	0.3416
	Delftia	G. apicola	0.2757	0.0636			Xanthomonadaceae	Gilliamella spp.	0.0279	0.8679
	Delftia	Gilliamella spp.	-0.216	0.1493			Xanthomonadaceae	P. apium	0.1878	0.2589
	Delftia	P. apium	-0.3222	0.029			Xanthomonadaceae	L. kunkeei	0.272	0.0985
	Delftia	L. kunkeei	-0.2518	0.0914			Xanthomonadaceae	Enterobacteriaceae	-0.1264	0.4497
	Delftia	Enterobacteriaceae	0.0064	0.9666			Xanthomonadaceae	Actinomycetales	0.2454	0.1376
	Delftia	Actinomycetales	-0.1075	0.4771			Delftia	Log 16s Copy#	-0.2508	0.1288
	Delftia	Xanthomonadaceae	0.0954	0.5282			Delftia	Log 18s Copy#	0.2638	0.1095
	Diversity abundance	Log 16s Copy#	-0.1852	0.2179			Delftia	Nosema ceranae	0.2664	0.1059
	Diversity abundance	Log 18s Copy#	0.4157	0.0041			Delftia	Diversity	0.3009	0.0664
	Diversity abundance	Diversity	0.3607	0.0138			Delftia	Lactobacillus Firm5	-0.21	0.2056
	Diversity abundance	Lactobacillus Firm5	0.2315	0.1217			Delftia	Lactobacillus Firm4	-0.0545	0.7451
	Diversity abundance	Lactobacillus Firm4	0.18	0.2312			Delftia	B. asteroides	-0.0506	0.7631
	Diversity abundance	B. asteroides	0.2802	0.0593			Delftia	S. alvi	-0.0744	0.6572
	Diversity abundance	S. alvi	-0.0915	0.5455			Delftia	G. apicola	-0.1217	0.4667
	Diversity abundance	G. apicola	0.1172	0.4378			Delftia	Gilliamella spp.	-0.062	0.7114
	Diversity abundance	Gilliamella spp.	-0.2619	0.0787			Delftia	P. apium	0.0398	0.8125
	Diversity abundance	P. apium	-0.2593	0.0818			Delftia	L. kunkeei	0.0652	0.6971
	Diversity abundance	L. kunkeei	-0.0607	0.6884			Delftia	Enterobacteriaceae	-0.0381	0.8203
	Diversity abundance	Enterobacteriaceae	0.3494	0.0173			Delftia	Actinomycetales	0.3416	0.0358
	Diversity abundance	Actinomycetales	-0.3442	0.0192			Delftia	Xanthomonadaceae	0.198	0.2335
	Diversity abundance	Xanthomonadaceae	0.3663	0.0123			Diversity abundance	Log 16s Copy#	-0.1487	0.3728
	Diversity abundance	Delftia	0.2382	0.1109			Diversity abundance	Log 18s Copy#	0.3904	0.0154
	Diversity abundance	Lachnospiraceae	-0.0786	0.6035			Diversity abundance	Nosema ceranae	-0.0826	0.6219
	Diversity abundance	Serratia	0.0765	0.6132			Diversity abundance	Diversity	0.592	0.0001
	Hymen	Log 16s Copy#	-0.0263	0.8624			Diversity abundance	Lactobacillus Firm5	0.1223	0.4647
	Hymen	Log 18s Copy#	-0.0866	0.5672			Diversity abundance	Lactobacillus Firm4	0.0918	0.5835
	Hymen	Diversity	0.0234	0.8772			Diversity abundance	B. asteroides	0.249	0.1317
	Hymen	Lactobacillus Firm5	-0.03	0.8429			Diversity abundance	S. alvi	0.2131	0.1989
	Hymen	Lactobacillus Firm4	-0.2691	0.0706			Diversity abundance	G. apicola	0.1371	0.4116
	Hymen	B. asteroides	-0.1499	0.3202			Diversity abundance	Gilliamella spp.	0.0203	0.9039
	Hymen	S. alvi	-0.1624	0.2809			Diversity abundance	P. apium	0.4033	0.012
	Hymen	G. apicola	-0.0974	0.5194			Diversity abundance	L. kunkeei	0.3182	0.0515
	Hymen	Gilliamella spp.	0.0514	0.7343			Diversity abundance	Enterobacteriaceae	0.0919	0.5832
	Hymen	P. apium	-0.1569	0.2977			Diversity abundance	Actinomycetales	0.7212	0.0001
	Hymen	L. kunkeei	-0.1441	0.3395			Diversity abundance	Xanthomonadaceae	0.1667	0.3171
	Hymen	Enterobacteriaceae	-0.1948	0.1945			Diversity abundance	Delftia	0.5014	0.0013
	Hymen	Actinomycetales	0.3779	0.0096			Diversity abundance	Lachnospiraceae	0.5211	0.0008
	Hymen	Xanthomonadaceae	-0.2565	0.0853			Diversity abundance	Serratia	0.2413	0.1445
	Hymen	Delftia	-0.0244	0.872			Hymen	Log 16s Copy#	0.1784	0.2356
	Hymen	Lachnospiraceae	-0.298	0.0443			Hymen	Log 18s Copy#	0.1163	0.4417
	Hymen	Serratia	-0.0473	0.7549			Hymen	Nosema ceranae	-0.3786	0.0095
	Hymen	Diversity abundance	-0.1139	0.451			Hymen	Diversity	-0.0436	0.7951
	Def-1	Log 16s Copy#	-0.2216	0.1389			Hymen	Lactobacillus Firm5	0.0181	0.9143
	Def-1	Log 18s Copy#	0.0094	0.9504			Hymen	Lactobacillus Firm4	0.0649	0.6987
	Def-1	Diversity	0.0462	0.7607			Hymen	B. asteroides	0.0795	0.635
	Def-1	Lactobacillus Firm5	0.1499	0.32			Hymen	S. alvi	0.2032	0.221
	Def-1	Lactobacillus Firm4	0.1214	0.4215			Hymen	G. apicola	0.1467	0.3794
	Def-1	B. asteroides	0.1582	0.2937			Hymen	Gilliamella spp.	0.0951	0.57
	Def-1	S. alvi	0.1292	0.3921			Hymen	P. apium	-0.267	0.1051
	Def-1	G. apicola	0.1779	0.2368			Hymen	L. kunkeei	-0.1872	0.2605
	Def-1	Gilliamella spp.	0.0605	0.6896			Hymen	Enterobacteriaceae	0.1158	0.4888
	Def-1	P. apium	-0.2364	0.1137			Hymen	Actinomycetales	-0.1875	0.2597
	Def-1	L. kunkeei	-0.3066	0.0382			Hymen	Xanthomonadaceae	-0.1822	0.2735
	Def-1	Enterobacteriaceae	-0.0918	0.5439			Hymen	Delftia	-0.3057	0.062
	Def-1	Actinomycetales	0.0272	0.8576			Hymen	Lachnospiraceae	-0.4288	0.0072
	Def-1	Xanthomonadaceae	0.0426	0.7786			Hymen	Serratia	-0.1145	0.4938
	Def-1	Delftia	-0.0082	0.9569			Hymen	Diversity abundance	-0.0702	0.6756
	Def-1	Lachnospiraceae	-0.278	0.0614			Def-1	Log 16s Copy#	0.0488	0.7475
	Def-1	Serratia	0.0022	0.9886			Def-1	Log 18s Copy#	-0.0831	0.5831
	Def-1	Diversity abundance	-0.1952	0.1936			Def-1	Nosema ceranae	-0.2768	0.0625
	Def-1	Hymen	0.2884	0.0519			Def-1	Diversity	-0.1351	0.4188
	Abaecin	Log 16s Copy#	-0.134	0.3746			Def-1	Lactobacillus Firm5	0.024	0.8864
	Abaecin	Log 18s Copy#	-0.0847	0.5758			Def-1	Lactobacillus Firm4	0.192	0.2481
	Abaecin	Diversity	0.1623	0.2813			Def-1	B. asteroides	0.2163	0.1921
	Abaecin	Lactobacillus Firm5	0.0233	0.8781			Def-1	S. alvi	0.1859	0.2637
	Abaecin	Lactobacillus Firm4	-0.2206	0.1407			Def-1	G. apicola	0.2122	0.201
	Abaecin	B. asteroides	-0.1159	0.4431			Def-1	Gilliamella spp.	0.0312	0.8525
	Abaecin	S. alvi	-0.0626	0.6794			Def-1	P. apium	-0.2362	0.1535
	Abaecin	G. apicola	-0.0516	0.7333			Def-1	L. kunkeei	-0.2985	0.0687
	Abaecin	Gilliamella spp.	0.1038	0.4924			Def-1	Enterobacteriaceae	0.1428	0.3924
	Abaecin	P. apium	-0.2492	0.0949			Def-1	Actinomycetales	-0.1375	0.4105
	Abaecin	L. kunkeei	-0.2174	0.1467			Def-1	Xanthomonadaceae	-0.0848	0.6126
	Abaecin	Enterobacteriaceae	-0.0839	0.5792			Def-1	Delftia	-0.0083	0.9607
	Abaecin	Actinomycetales	0.2883	0.052			Def-1	Lachnospiraceae	-0.2476	0.1339
	Abaecin	Xanthomonadaceae	-0.2005	0.1815			Def-1	Serratia	-0.0815	0.6268
	Abaecin	Delftia	-0.0347	0.8188			Def-1	Diversity abundance	-0.0286	0.8648
	Abaecin	Lachnospiraceae	-0.3363	0.0223			Def-1	Hymen	0.2884	0.0519
	Abaecin	Serratia	-0.1285	0.3949			Abaecin	Log 16s Copy#	0.2953	0.0463
	Abaecin	Diversity abundance	-0.0578	0.7029			Abaecin	Log 18s Copy#	0.1288	0.3935
	Abaecin	Hymen	0.8699	0.0001			Abaecin	Nosema ceranae	-0.36	0.014
	Abaecin	Def-1	0.442	0.0021			Abaecin	Diversity	-0.1229	0.4622
	GOX	Log 16s Copy#	-0.0329	0.8283			Abaecin	Lactobacillus Firm5	-0.0062	0.9704
	GOX	Log 18s Copy#	-0.2284	0.1269			Abaecin	Lactobacillus Firm4	0.1205	0.4712
	GOX	Diversity	-0.0966	0.5232			Abaecin	B. asteroides	0.0546	0.7447
	GOX	Lactobacillus Firm5	0.1317	0.3831			Abaecin	S. alvi	0.2702	0.1008
	GOX	Lactobacillus Firm4	-0.02	0.8948			Abaecin	G. apicola	0.1561	0.3492
	GOX	B. asteroides	0.0215	0.8871			Abaecin	Gilliamella spp.	0.2709	0.1
	GOX	S. alvi	0.1695	0.26			Abaecin	P. apium	-0.3337	0.0406
	GOX	G. apicola	0.1637	0.2769			Abaecin	L. kunkeei	-0.2659	0.1066
	GOX	Gilliamella spp.	0.2278	0.1279			Abaecin	Enterobacteriaceae	0.2558	0.121
	GOX	P. apium	-0.144	0.3397			Abaecin	Actinomycetales	-0.202	0.2239
	GOX	L. kunkeei	-0.1154	0.4451			Abaecin	Xanthomonadaceae	-0.1757	0.2915
	GOX	Enterobacteriaceae	-0.2122	0.1568			Abaecin	Delftia	-0.2715	0.0992
	GOX	Actinomycetales	0.129	0.393			Abaecin	Lachnospiraceae	-0.4489	0.0047
	GOX	Xanthomonadaceae	-0.3655	0.0125			Abaecin	Serratia	-0.2864	0.0813
	GOX	Delftia	0.0294	0.8461			Abaecin	Diversity abundance	-0.092	0.5826
	GOX	Lachnospiraceae	-0.107	0.4791			Abaecin	Hymen	0.8699	0.0001
	GOX	Serratia	-0.036	0.8125			Abaecin	Def-1	0.442	0.0021
	GOX	Diversity abundance	-0.3228	0.0286			GOX	Log 16s Copy#	0.2648	0.0754
	GOX	Hymen	0.5311	0.0001			GOX	Log 18s Copy#	-0.0637	0.674
	GOX	Def-1	0.71	0.0001			GOX	Nosema ceranae	-0.3951	0.0066
	GOX	Abaecin	0.6717	0.0001			GOX	Diversity	-0.083	0.6204
	CAT	Log 16s Copy#	0.0505	0.7391			GOX	Lactobacillus Firm5	0.2988	0.0684
	CAT	Log 18s Copy#	-0.0682	0.6524			GOX	Lactobacillus Firm4	0.331	0.0424
	CAT	Diversity	-0.0249	0.8695			GOX	B. asteroides	0.452	0.0044
	CAT	Lactobacillus Firm5	0.1188	0.4317			GOX	S. alvi	0.5421	0.0004
	CAT	Lactobacillus Firm4	-0.0306	0.8401			GOX	G. apicola	0.4411	0.0056
	CAT	B. asteroides	-0.0542	0.7208			GOX	Gilliamella spp.	0.1474	0.3771
	CAT	S. alvi	-0.1398	0.3542			GOX	P. apium	-0.142	0.3951
	CAT	G. apicola	-0.0654	0.6657			GOX	L. kunkeei	-0.0382	0.8199
	CAT	Gilliamella spp.	0.0596	0.6938			GOX	Enterobacteriaceae	0.1395	0.4035
	CAT	P. apium	0.021	0.89			GOX	Actinomycetales	-0.0021	0.9899
	CAT	L. kunkeei	0.0807	0.5938			GOX	Xanthomonadaceae	-0.1277	0.4448
	CAT	Enterobacteriaceae	0.2062	0.1692			GOX	Delftia	-0.2336	0.1581
	CAT	Actinomycetales	-0.1583	0.2933			GOX	Lachnospiraceae	-0.3005	0.0668
	CAT	Xanthomonadaceae	0.0886	0.558			GOX	Serratia	-0.2068	0.2128
	CAT	Delftia	0.1176	0.4363			GOX	Diversity abundance	0.0785	0.6396
	CAT	Lachnospiraceae	-0.0146	0.9235			GOX	Hymen	0.5311	0.0001
	CAT	Serratia	-0.1187	0.4319			GOX	Def-1	0.71	0.0001
	CAT	Diversity abundance	0.2349	0.116			GOX	Abaecin	0.6717	0.0001
	CAT	Hymen	0.1106	0.4644			CAT	Log 16s Copy#	0.0439	0.7723
	CAT	Def-1	-0.1897	0.2068			CAT	Log 18s Copy#	0.1272	0.3994
	CAT	Abaecin	0.1124	0.4569			CAT	Nosema ceranae	-0.1656	0.2714
	CAT	GOX	-0.0838	0.58			CAT	Diversity	0.3359	0.0393
	Cu/Zn Sod	Log 16s Copy#	0.1063	0.4818			CAT	Lactobacillus Firm5	-0.3786	0.0191
	Cu/Zn Sod	Log 18s Copy#	-0.4752	0.0008			CAT	Lactobacillus Firm4	-0.28	0.0886
	Cu/Zn Sod	Diversity	0.0078	0.9588			CAT	B. asteroides	-0.1635	0.3267
	Cu/Zn Sod	Lactobacillus Firm5	-0.1503	0.3189			CAT	S. alvi	-0.1091	0.5143
	Cu/Zn Sod	Lactobacillus Firm4	-0.2476	0.0971			CAT	G. apicola	-0.2574	0.1187
	Cu/Zn Sod	B. asteroides	-0.1611	0.2849			CAT	Gilliamella spp.	0.2072	0.212
	Cu/Zn Sod	S. alvi	0.1177	0.436			CAT	P. apium	0.2355	0.1547
	Cu/Zn Sod	G. apicola	-0.0388	0.7979			CAT	L. kunkeei	0.4287	0.0073
	Cu/Zn Sod	Gilliamella spp.	0.2717	0.0678			CAT	Enterobacteriaceae	0.02	0.9052
	Cu/Zn Sod	P. apium	0.0844	0.5771			CAT	Actinomycetales	0.2193	0.1858
	Cu/Zn Sod	L. kunkeei	-0.0071	0.9627			CAT	Xanthomonadaceae	0.2889	0.0786
	Cu/Zn Sod	Enterobacteriaceae	-0.264	0.0762			CAT	Delftia	0.1662	0.3186
	Cu/Zn Sod	Actinomycetales	0.4301	0.0029			CAT	Lachnospiraceae	0.0771	0.6452
	Cu/Zn Sod	Xanthomonadaceae	-0.5027	0.0004			CAT	Serratia	-0.0624	0.7096
	Cu/Zn Sod	Delftia	-0.0363	0.8109			CAT	Diversity abundance	0.2243	0.1758
	Cu/Zn Sod	Lachnospiraceae	-0.0028	0.9854			CAT	Age	0.1563	0.2996
	Cu/Zn Sod	Serratia	-0.2118	0.1577			CAT	Hymen	0.1106	0.4644
	Cu/Zn Sod	Diversity abundance	-0.3774	0.0097			CAT	Def-1	-0.1897	0.2068
	Cu/Zn Sod	Hymen	0.5309	0.0001			CAT	Abaecin	0.1124	0.4569
	Cu/Zn Sod	Def-1	0.3262	0.0269			CAT	GOX	-0.0838	0.58
	Cu/Zn Sod	Abaecin	0.6441	0.0001			Cu/Zn Sod	Log 16s Copy#	0.3311	0.0246
	Cu/Zn Sod	GOX	0.693	0.0001			Cu/Zn Sod	Log 18s Copy#	0.0904	0.55
	Cu/Zn Sod	CAT	0.0667	0.6597			Cu/Zn Sod	Nosema ceranae	-0.3191	0.0307
	MnSod	Log 16s Copy#	0.1226	0.4171			Cu/Zn Sod	Diversity	0.0014	0.9932
	MnSod	Log 18s Copy#	-0.4791	0.0008			Cu/Zn Sod	Lactobacillus Firm5	0.328	0.0444
	MnSod	Diversity	0.0201	0.8943			Cu/Zn Sod	Lactobacillus Firm4	0.2573	0.1188
	MnSod	Lactobacillus Firm5	-0.1964	0.1908			Cu/Zn Sod	B. asteroides	0.3749	0.0204
	MnSod	Lactobacillus Firm4	-0.2192	0.1433			Cu/Zn Sod	S. alvi	0.5291	0.0006
	MnSod	B. asteroides	-0.2306	0.1231			Cu/Zn Sod	G. apicola	0.3168	0.0527
	MnSod	S. alvi	0.0902	0.5512			Cu/Zn Sod	Gilliamella spp.	0.0419	0.8026
	MnSod	G. apicola	-0.0722	0.6334			Cu/Zn Sod	P. apium	-0.144	0.3884
	MnSod	Gilliamella spp.	0.3735	0.0106			Cu/Zn Sod	L. kunkeei	-0.0485	0.7723
	MnSod	P. apium	0.1087	0.4719			Cu/Zn Sod	Enterobacteriaceae	0.3226	0.0483
	MnSod	L. kunkeei	0.0389	0.7973			Cu/Zn Sod	Actinomycetales	-0.0212	0.8994
	MnSod	Enterobacteriaceae	-0.2579	0.0835			Cu/Zn Sod	Xanthomonadaceae	-0.2015	0.225
	MnSod	Actinomycetales	0.5202	0.0002			Cu/Zn Sod	Delftia	-0.2112	0.2031
	MnSod	Xanthomonadaceae	-0.5472	0.0001			Cu/Zn Sod	Lachnospiraceae	-0.3108	0.0575
	MnSod	Delftia	-0.062	0.6821			Cu/Zn Sod	Serratia	-0.1729	0.2993
	MnSod	Lachnospiraceae	0.0078	0.9591			Cu/Zn Sod	Diversity abundance	0.1364	0.4142
	MnSod	Serratia	-0.204	0.1739			Cu/Zn Sod	Age	0.7068	0.0001
	MnSod	Diversity abundance	-0.4131	0.0043			Cu/Zn Sod	Hymen	0.5309	0.0001
	MnSod	Hymen	0.5362	0.0001			Cu/Zn Sod	Def-1	0.3262	0.0269
	MnSod	Def-1	0.2576	0.084			Cu/Zn Sod	Abaecin	0.6441	0.0001
	MnSod	Abaecin	0.6471	0.0001			Cu/Zn Sod	GOX	0.693	0.0001
	MnSod	GOX	0.6362	0.0001			Cu/Zn Sod	CAT	0.0667	0.6597
	MnSod	CAT	0.0345	0.8197			MnSod	Log 16s Copy#	0.3064	0.0383
	MnSod	Cu/Zn Sod	0.9576	0.0001			MnSod	Log 18s Copy#	0.1548	0.3043
	Vg	Log 16s Copy#	-0.0055	0.9712			MnSod	Nosema ceranae	-0.2983	0.044
	Vg	Log 18s Copy#	-0.0123	0.936			MnSod	Diversity	0.0198	0.9063
	Vg	Diversity	0.0305	0.8426			MnSod	Lactobacillus Firm5	0.3882	0.016
	Vg	Lactobacillus Firm5	-0.1875	0.2175			MnSod	Lactobacillus Firm4	0.233	0.1592
	Vg	Lactobacillus Firm4	-0.2753	0.0672			MnSod	B. asteroides	0.3279	0.0445
	Vg	B. asteroides	-0.1246	0.4149			MnSod	S. alvi	0.5418	0.0004
	Vg	S. alvi	-0.1619	0.2879			MnSod	G. apicola	0.3975	0.0135
	Vg	G. apicola	-0.247	0.1018			MnSod	Gilliamella spp.	-0.001	0.9953
	Vg	Gilliamella spp.	-0.0554	0.7177			MnSod	P. apium	-0.0591	0.7244
	Vg	P. apium	0.046	0.7639			MnSod	L. kunkeei	-0.0007	0.9966
	Vg	L. kunkeei	-0.1293	0.3972			MnSod	Enterobacteriaceae	0.3583	0.0272
	Vg	Enterobacteriaceae	-0.0547	0.721			MnSod	Actinomycetales	0.0545	0.7452
	Vg	Actinomycetales	0.1912	0.2084			MnSod	Xanthomonadaceae	-0.151	0.3656
	Vg	Xanthomonadaceae	-0.0283	0.8538			MnSod	Delftia	-0.2878	0.0798
	Vg	Delftia	-0.102	0.5048			MnSod	Lachnospiraceae	-0.2821	0.0862
	Vg	Lachnospiraceae	-0.1593	0.2959			MnSod	Serratia	-0.1117	0.5043
	Vg	Serratia	-0.149	0.3286			MnSod	Diversity abundance	0.1388	0.4059
	Vg	Diversity abundance	-0.0717	0.6399			MnSod	Age	0.7501	0.0001
	Vg	Hymen	0.069	0.6522			MnSod	Hymen	0.5362	0.0001
	Vg	Def-1	0.2615	0.0827			MnSod	Def-1	0.2576	0.084
	Vg	Abaecin	0.2459	0.1034			MnSod	Abaecin	0.6471	0.0001
	Vg	GOX	0.1895	0.2124			MnSod	GOX	0.6362	0.0001
	Vg	CAT	-0.0094	0.9512			MnSod	CAT	0.0345	0.8197
	Vg	Cu/Zn Sod	0.3429	0.0211			MnSod	Cu/Zn Sod	0.9576	0.0001
	Vg	MnSod	0.3209	0.0316			Vg	Log 16s Copy#	0.2237	0.1397
							Vg	Log 18s Copy#	0.0406	0.7909
							Vg	Nosema ceranae	0.1376	0.3673
							Vg	Diversity	-0.0832	0.6245
							Vg	Lactobacillus Firm5	-0.0867	0.6101
							Vg	Lactobacillus Firm4	0.0478	0.7789
							Vg	B. asteroides	0.0729	0.6681
							Vg	S. alvi	-0.085	0.6169
							Vg	G. apicola	-0.0624	0.7139
							Vg	Gilliamella spp.	0.2546	0.1284
							Vg	P. apium	-0.0184	0.914
							Vg	L. kunkeei	-0.112	0.5093
							Vg	Enterobacteriaceae	0.1752	0.2997
							Vg	Actinomycetales	-0.0999	0.5565
							Vg	Xanthomonadaceae	0.1142	0.501
							Vg	Delftia	-0.0404	0.8125
							Vg	Lachnospiraceae	-0.0653	0.7011
							Vg	Serratia	-0.2525	0.1316
							Vg	Diversity abundance	0.0167	0.9218
							Vg	Age	0.0979	0.5224
							Vg	Hymen	0.069	0.6522
							Vg	Def-1	0.2615	0.0827
							Vg	Abaecin	0.2459	0.1034
							Vg	GOX	0.1895	0.2124
							Vg	CAT	-0.0094	0.9512
							Vg	Cu/Zn Sod	0.3429	0.0211
							Vg	MnSod	0.3209	0.0316

## Sheet: WW Correlations
Anderson and Maes 2021, Gut and Colony Microbiota of Honey Bees: Social Immunity and Opportunism Overwinter
Table S4: Correlations among dependent variables from the WW samples in early and late winter
The column on the right is a subset of that on the left, containing only strong and mild relationships ordered by p-value.
Serratia contained over 50% zero values and was omitted from the correlation analysis.
WW Midguts					WW Midguts
Variable	by Variable	Spearman ρ	Prob>|ρ|		Variable	by Variable	Spearman ρ	Prob>|ρ|
Log 18s Copy#	Log 16s Copy#	0.3083	0.086		Diversity	Log 18s Copy#	0.67	0.0001
Nosema ceranae	Log 16s Copy#	0.2174	0.2321		B. asteroides	Lactobacillus Firm5	0.7206	0.0001
Nosema ceranae	Log 18s Copy#	0.4978	0.0037		G. apicola	Log 16s Copy#	0.7669	0.0001
Diversity	Log 16s Copy#	-0.154	0.4164		Enterobacteriaceae	Log 16s Copy#	0.7327	0.0001
Diversity	Log 18s Copy#	0.67	0.0001		Enterobacteriaceae	Gilliamella spp.	0.7757	0.0001
Diversity	Nosema ceranae	0.2475	0.1872		Actinomycetales	Log 18s Copy#	0.7585	0.0001
Lactobacillus Firm5	Log 16s Copy#	0.3789	0.039		Diversity abundance	Log 18s Copy#	0.7775	0.0001
Lactobacillus Firm5	Log 18s Copy#	-0.2832	0.1294		Diversity abundance	Actinomycetales	0.8822	0.0001
Lactobacillus Firm5	Nosema ceranae	0.0848	0.6561		Cu/Zn Sod	GOX	0.7399	0.0001
Lactobacillus Firm5	Diversity	-0.4641	0.0098		MnSod	Cu/Zn Sod	0.7918	0.0001
Lactobacillus Firm4	Log 16s Copy#	0.2752	0.1411		Gilliamella spp.	Log 18s Copy#	0.6361	0.0002
Lactobacillus Firm4	Log 18s Copy#	0.0665	0.7269		Diversity abundance	Diversity	0.6244	0.0002
Lactobacillus Firm4	Nosema ceranae	0.1884	0.3187		Cu/Zn Sod	Def-1	0.6081	0.0002
Lactobacillus Firm4	Diversity	-0.1202	0.5269		Diversity abundance	Gilliamella spp.	0.6111	0.0003
Lactobacillus Firm4	Lactobacillus Firm5	0.5408	0.002		GOX	Def-1	0.6016	0.0003
B. asteroides	Log 16s Copy#	0.1929	0.3072		MnSod	GOX	0.6129	0.0003
B. asteroides	Log 18s Copy#	-0.3428	0.0637		L. kunkeei	P. apium	0.5835	0.0007
B. asteroides	Nosema ceranae	-0.0118	0.9507		MnSod	Def-1	0.5853	0.0007
B. asteroides	Diversity	-0.3982	0.0293		Actinomycetales	Gilliamella spp.	0.5784	0.0008
B. asteroides	Lactobacillus Firm5	0.7206	0.0001		P. apium	Gilliamella spp.	0.5737	0.0009
B. asteroides	Lactobacillus Firm4	0.4198	0.0209		Actinomycetales	Diversity	0.5669	0.0011
S. alvi	Log 16s Copy#	0.2269	0.2278		Enterobacteriaceae	G. apicola	0.5617	0.0012
S. alvi	Log 18s Copy#	0.0563	0.7676		Actinomycetales	Enterobacteriaceae	0.5567	0.0014
S. alvi	Nosema ceranae	0.2993	0.1082		Gilliamella spp.	Log 16s Copy#	0.5465	0.0018
S. alvi	Diversity	-0.117	0.5381		Lactobacillus Firm4	Lactobacillus Firm5	0.5408	0.002
S. alvi	Lactobacillus Firm5	0.3237	0.081		Vg	Diversity abundance	-0.6143	0.0031
S. alvi	Lactobacillus Firm4	-0.0205	0.9145		Enterobacteriaceae	Log 18s Copy#	0.5205	0.0032
S. alvi	B. asteroides	0.3851	0.0356		Hymen	Diversity	-0.5227	0.0036
G. apicola	Log 16s Copy#	0.7669	0.0001		Nosema ceranae	Log 18s Copy#	0.4978	0.0037
G. apicola	Log 18s Copy#	0.1631	0.3892		P. apium	Log 16s Copy#	0.5128	0.0038
G. apicola	Nosema ceranae	0.2334	0.2146		Gilliamella spp.	G. apicola	0.5064	0.0043
G. apicola	Diversity	-0.2963	0.1119		Enterobacteriaceae	P. apium	0.5002	0.0049
G. apicola	Lactobacillus Firm5	0.4727	0.0083		Lachnospiraceae	Diversity	0.5004	0.0049
G. apicola	Lactobacillus Firm4	0.2076	0.2711		Vg	Diversity	-0.5879	0.0051
G. apicola	B. asteroides	0.3059	0.1002		GOX	Hymen	0.4919	0.0058
G. apicola	S. alvi	0.35	0.058		Vg	Log 18s Copy#	-0.5553	0.0059
Gilliamella spp.	Log 16s Copy#	0.5465	0.0018		Hymen	Log 18s Copy#	-0.4786	0.0065
Gilliamella spp.	Log 18s Copy#	0.6361	0.0002		Hymen	Nosema ceranae	-0.4782	0.0065
Gilliamella spp.	Nosema ceranae	0.485	0.0066		Gilliamella spp.	Nosema ceranae	0.485	0.0066
Gilliamella spp.	Diversity	0.3313	0.0737		Diversity abundance	Nosema ceranae	0.4772	0.0077
Gilliamella spp.	Lactobacillus Firm5	-0.0011	0.9953		G. apicola	Lactobacillus Firm5	0.4727	0.0083
Gilliamella spp.	Lactobacillus Firm4	0.2785	0.1362		Vg	Hymen	0.5356	0.0084
Gilliamella spp.	B. asteroides	-0.0899	0.6368		Abaecin	Xanthomonadaceae	-0.4657	0.0095
Gilliamella spp.	S. alvi	0.1498	0.4293		Lactobacillus Firm5	Diversity	-0.4641	0.0098
Gilliamella spp.	G. apicola	0.5064	0.0043		Diversity abundance	Enterobacteriaceae	0.4586	0.0108
P. apium	Log 16s Copy#	0.5128	0.0038		Vg	Actinomycetales	-0.5411	0.0113
P. apium	Log 18s Copy#	0.3869	0.0347		Lachnospiraceae	G. apicola	-0.4532	0.0119
P. apium	Nosema ceranae	0.257	0.1705		Abaecin	Enterobacteriaceae	0.4481	0.013
P. apium	Diversity	0.1988	0.2923		Cu/Zn Sod	Nosema ceranae	-0.4344	0.013
P. apium	Lactobacillus Firm5	-0.1279	0.5005		GOX	Nosema ceranae	-0.4302	0.0157
P. apium	Lactobacillus Firm4	0.0314	0.8693		B. asteroides	Lactobacillus Firm4	0.4198	0.0209
P. apium	B. asteroides	0.0225	0.9062		Lachnospiraceae	Lactobacillus Firm5	-0.4138	0.023
P. apium	S. alvi	0.1453	0.4437		Def-1	Nosema ceranae	-0.4007	0.0231
P. apium	G. apicola	0.3962	0.0302		Delftia	P. apium	0.402	0.0277
P. apium	Gilliamella spp.	0.5737	0.0009		Xanthomonadaceae	Log 18s Copy#	-0.4016	0.0278
L. kunkeei	Log 16s Copy#	0.1193	0.5301		B. asteroides	Diversity	-0.3982	0.0293
L. kunkeei	Log 18s Copy#	0.3258	0.079		P. apium	G. apicola	0.3962	0.0302
L. kunkeei	Nosema ceranae	0.2504	0.182		P. apium	Log 18s Copy#	0.3869	0.0347
L. kunkeei	Diversity	0.2699	0.1491		Hymen	Actinomycetales	-0.3927	0.0351
L. kunkeei	Lactobacillus Firm5	-0.3266	0.0781		Delftia	Log 16s Copy#	0.3855	0.0354
L. kunkeei	Lactobacillus Firm4	-0.2722	0.1456		S. alvi	B. asteroides	0.3851	0.0356
L. kunkeei	B. asteroides	-0.2437	0.1944		Enterobacteriaceae	Lactobacillus Firm4	0.3846	0.0358
L. kunkeei	S. alvi	0.3271	0.0776		Lactobacillus Firm5	Log 16s Copy#	0.3789	0.039
L. kunkeei	G. apicola	0.1889	0.3176		Actinomycetales	Nosema ceranae	0.3727	0.0425
L. kunkeei	Gilliamella spp.	0.3242	0.0804		MnSod	Hymen	0.3722	0.0428
L. kunkeei	P. apium	0.5835	0.0007		MnSod	P. apium	0.3815	0.0452
Enterobacteriaceae	Log 16s Copy#	0.7327	0.0001		Diversity abundance	L. kunkeei	0.3681	0.0453
Enterobacteriaceae	Log 18s Copy#	0.5205	0.0032		Xanthomonadaceae	Enterobacteriaceae	-0.3639	0.0481
Enterobacteriaceae	Nosema ceranae	0.2635	0.1595		GOX	Diversity	-0.367	0.0502
Enterobacteriaceae	Diversity	0.0954	0.6161
Enterobacteriaceae	Lactobacillus Firm5	0.1615	0.394
Enterobacteriaceae	Lactobacillus Firm4	0.3846	0.0358
Enterobacteriaceae	B. asteroides	0.1165	0.5399
Enterobacteriaceae	S. alvi	0.1441	0.4474
Enterobacteriaceae	G. apicola	0.5617	0.0012
Enterobacteriaceae	Gilliamella spp.	0.7757	0.0001
Enterobacteriaceae	P. apium	0.5002	0.0049
Enterobacteriaceae	L. kunkeei	0.1286	0.4983
Actinomycetales	Log 16s Copy#	0.3333	0.0719
Actinomycetales	Log 18s Copy#	0.7585	0.0001
Actinomycetales	Nosema ceranae	0.3727	0.0425
Actinomycetales	Diversity	0.5669	0.0011
Actinomycetales	Lactobacillus Firm5	-0.3166	0.0883
Actinomycetales	Lactobacillus Firm4	0.154	0.4166
Actinomycetales	B. asteroides	-0.2094	0.2668
Actinomycetales	S. alvi	0.1414	0.456
Actinomycetales	G. apicola	0.0505	0.791
Actinomycetales	Gilliamella spp.	0.5784	0.0008
Actinomycetales	P. apium	0.3551	0.0542
Actinomycetales	L. kunkeei	0.3059	0.1001
Actinomycetales	Enterobacteriaceae	0.5567	0.0014
Xanthomonadaceae	Log 16s Copy#	-0.3091	0.0965
Xanthomonadaceae	Log 18s Copy#	-0.4016	0.0278
Xanthomonadaceae	Nosema ceranae	0.0276	0.8848
Xanthomonadaceae	Diversity	-0.1347	0.4779
Xanthomonadaceae	Lactobacillus Firm5	0.071	0.7091
Xanthomonadaceae	Lactobacillus Firm4	0.141	0.4574
Xanthomonadaceae	B. asteroides	0.32	0.0847
Xanthomonadaceae	S. alvi	0.3142	0.0909
Xanthomonadaceae	G. apicola	-0.3125	0.0927
Xanthomonadaceae	Gilliamella spp.	-0.3596	0.051
Xanthomonadaceae	P. apium	-0.1474	0.4369
Xanthomonadaceae	L. kunkeei	0.0998	0.5999
Xanthomonadaceae	Enterobacteriaceae	-0.3639	0.0481
Xanthomonadaceae	Actinomycetales	-0.0429	0.822
Delftia	Log 16s Copy#	0.3855	0.0354
Delftia	Log 18s Copy#	0.0532	0.7802
Delftia	Nosema ceranae	0.1008	0.5962
Delftia	Diversity	-0.2987	0.1088
Delftia	Lactobacillus Firm5	0.1115	0.5576
Delftia	Lactobacillus Firm4	0.3491	0.0587
Delftia	B. asteroides	0.2872	0.1238
Delftia	S. alvi	0.111	0.5592
Delftia	G. apicola	0.2779	0.1371
Delftia	Gilliamella spp.	0.2326	0.2162
Delftia	P. apium	0.402	0.0277
Delftia	L. kunkeei	0.1322	0.4861
Delftia	Enterobacteriaceae	0.3096	0.096
Delftia	Actinomycetales	0.273	0.1444
Delftia	Xanthomonadaceae	0.3265	0.0782
Lachnospiraceae	Log 16s Copy#	-0.2332	0.2149
Lachnospiraceae	Log 18s Copy#	0.158	0.4042
Lachnospiraceae	Nosema ceranae	-0.2054	0.2763
Lachnospiraceae	Diversity	0.5004	0.0049
Lachnospiraceae	Lactobacillus Firm5	-0.4138	0.023
Lachnospiraceae	Lactobacillus Firm4	-0.2309	0.2196
Lachnospiraceae	B. asteroides	-0.2504	0.182
Lachnospiraceae	S. alvi	-0.2857	0.1259
Lachnospiraceae	G. apicola	-0.4532	0.0119
Lachnospiraceae	Gilliamella spp.	-0.1147	0.5463
Lachnospiraceae	P. apium	-0.1562	0.4099
Lachnospiraceae	L. kunkeei	0.0267	0.8884
Lachnospiraceae	Enterobacteriaceae	-0.1968	0.2973
Lachnospiraceae	Actinomycetales	0.2541	0.1754
Lachnospiraceae	Xanthomonadaceae	0.0367	0.8473
Lachnospiraceae	Delftia	-0.0592	0.7561
Diversity abundance	Log 16s Copy#	0.2863	0.1251
Diversity abundance	Log 18s Copy#	0.7775	0.0001
Diversity abundance	Nosema ceranae	0.4772	0.0077
Diversity abundance	Diversity	0.6244	0.0002
Diversity abundance	Lactobacillus Firm5	-0.2169	0.2496
Diversity abundance	Lactobacillus Firm4	0.1849	0.3281
Diversity abundance	B. asteroides	-0.2004	0.2882
Diversity abundance	S. alvi	0.1916	0.3105
Diversity abundance	G. apicola	0.075	0.6938
Diversity abundance	Gilliamella spp.	0.6111	0.0003
Diversity abundance	P. apium	0.3459	0.0611
Diversity abundance	L. kunkeei	0.3681	0.0453
Diversity abundance	Enterobacteriaceae	0.4586	0.0108
Diversity abundance	Actinomycetales	0.8822	0.0001
Diversity abundance	Xanthomonadaceae	-0.0388	0.8389
Diversity abundance	Delftia	0.1889	0.3175
Diversity abundance	Lachnospiraceae	0.2847	0.1272
Diversity abundance	Serratia	0.1148	0.5456
Hymen	Log 16s Copy#	-0.1089	0.5599
Hymen	Log 18s Copy#	-0.4786	0.0065
Hymen	Nosema ceranae	-0.4782	0.0065
Hymen	Diversity	-0.5227	0.0036
Hymen	Lactobacillus Firm5	0.3488	0.0637
Hymen	Lactobacillus Firm4	0.2315	0.2269
Hymen	B. asteroides	0.1729	0.3697
Hymen	S. alvi	-0.0461	0.8124
Hymen	G. apicola	-0.001	0.996
Hymen	Gilliamella spp.	-0.1832	0.3414
Hymen	P. apium	-0.0517	0.7899
Hymen	L. kunkeei	-0.1185	0.5403
Hymen	Enterobacteriaceae	-0.1063	0.5832
Hymen	Actinomycetales	-0.3927	0.0351
Hymen	Xanthomonadaceae	0.1248	0.519
Hymen	Delftia	0.1852	0.3361
Hymen	Lachnospiraceae	-0.2607	0.1719
Hymen	Serratia	-0.1539	0.4255
Hymen	Diversity abundance	-0.3631	0.0529
Def-1	Log 16s Copy#	-0.0029	0.9873
Def-1	Log 18s Copy#	-0.2177	0.2312
Def-1	Nosema ceranae	-0.4007	0.0231
Def-1	Diversity	-0.2273	0.2271
Def-1	Lactobacillus Firm5	0.0474	0.8036
Def-1	Lactobacillus Firm4	0.1769	0.3498
Def-1	B. asteroides	0.0972	0.6093
Def-1	S. alvi	-0.2138	0.2566
Def-1	G. apicola	-0.156	0.4105
Def-1	Gilliamella spp.	-0.1336	0.4817
Def-1	P. apium	-0.002	0.9916
Def-1	L. kunkeei	-0.1104	0.5615
Def-1	Enterobacteriaceae	-0.1085	0.5683
Def-1	Actinomycetales	-0.1262	0.5065
Def-1	Xanthomonadaceae	0.0891	0.6397
Def-1	Delftia	0.22	0.2427
Def-1	Lachnospiraceae	0.0754	0.692
Def-1	Serratia	-0.0735	0.6996
Def-1	Diversity abundance	-0.1755	0.3535
Def-1	Hymen	0.3327	0.0675
Abaecin	Log 16s Copy#	0.2383	0.1891
Abaecin	Log 18s Copy#	0.1349	0.4617
Abaecin	Nosema ceranae	-0.121	0.5096
Abaecin	Diversity	-0.1204	0.5262
Abaecin	Lactobacillus Firm5	0.1319	0.4871
Abaecin	Lactobacillus Firm4	0.1969	0.297
Abaecin	B. asteroides	0.0683	0.7199
Abaecin	S. alvi	-0.0554	0.7712
Abaecin	G. apicola	0.3063	0.0997
Abaecin	Gilliamella spp.	0.2499	0.1828
Abaecin	P. apium	0.2236	0.235
Abaecin	L. kunkeei	-0.0965	0.6118
Abaecin	Enterobacteriaceae	0.4481	0.013
Abaecin	Actinomycetales	-0.0256	0.8932
Abaecin	Xanthomonadaceae	-0.4657	0.0095
Abaecin	Delftia	0.1092	0.5656
Abaecin	Lachnospiraceae	-0.2959	0.1124
Abaecin	Serratia	0.1448	0.4452
Abaecin	Diversity abundance	-0.1101	0.5624
Abaecin	Hymen	0.0883	0.6366
Abaecin	Def-1	0.0286	0.8766
GOX	Log 16s Copy#	0.1649	0.3753
GOX	Log 18s Copy#	-0.2633	0.1524
GOX	Nosema ceranae	-0.4302	0.0157
GOX	Diversity	-0.367	0.0502
GOX	Lactobacillus Firm5	0.2241	0.2425
GOX	Lactobacillus Firm4	0.3064	0.106
GOX	B. asteroides	0.3399	0.0712
GOX	S. alvi	-0.0308	0.874
GOX	G. apicola	0.0079	0.9676
GOX	Gilliamella spp.	-0.0573	0.7679
GOX	P. apium	0.1335	0.49
GOX	L. kunkeei	-0.0844	0.6632
GOX	Enterobacteriaceae	0.1097	0.5709
GOX	Actinomycetales	-0.1335	0.4899
GOX	Xanthomonadaceae	0.0525	0.7867
GOX	Delftia	0.2532	0.1851
GOX	Lachnospiraceae	-0.1456	0.451
GOX	Serratia	-0.0976	0.6144
GOX	Diversity abundance	-0.1606	0.4053
GOX	Hymen	0.4919	0.0058
GOX	Def-1	0.6016	0.0003
GOX	Abaecin	0.2097	0.2576
CAT	Log 16s Copy#	0.0443	0.8163
CAT	Log 18s Copy#	-0.1039	0.5848
CAT	Nosema ceranae	-0.1488	0.4325
CAT	Diversity	0.0879	0.6564
CAT	Lactobacillus Firm5	-0.0837	0.6718
CAT	Lactobacillus Firm4	0.0443	0.8227
CAT	B. asteroides	0.0137	0.9449
CAT	S. alvi	0.0999	0.613
CAT	G. apicola	0.0487	0.8056
CAT	Gilliamella spp.	0.1213	0.5387
CAT	P. apium	0.1511	0.4429
CAT	L. kunkeei	0.1509	0.4433
CAT	Enterobacteriaceae	0.1132	0.5663
CAT	Actinomycetales	0.3339	0.0824
CAT	Xanthomonadaceae	-0.0225	0.9096
CAT	Delftia	-0.017	0.9317
CAT	Lachnospiraceae	0.083	0.6746
CAT	Serratia	-0.2036	0.2988
CAT	Diversity abundance	0.3585	0.061
CAT	Hymen	0.135	0.4851
CAT	Def-1	-0.0919	0.6292
CAT	Abaecin	-0.1849	0.3281
CAT	GOX	-0.0745	0.6955
Cu/Zn Sod	Log 16s Copy#	0.1591	0.3845
Cu/Zn Sod	Log 18s Copy#	0.0194	0.9159
Cu/Zn Sod	Nosema ceranae	-0.4344	0.013
Cu/Zn Sod	Diversity	-0.1669	0.3779
Cu/Zn Sod	Lactobacillus Firm5	-0.1052	0.58
Cu/Zn Sod	Lactobacillus Firm4	0.0309	0.8711
Cu/Zn Sod	B. asteroides	0.0487	0.7982
Cu/Zn Sod	S. alvi	-0.265	0.157
Cu/Zn Sod	G. apicola	-0.0429	0.8218
Cu/Zn Sod	Gilliamella spp.	0.056	0.769
Cu/Zn Sod	P. apium	0.2316	0.2182
Cu/Zn Sod	L. kunkeei	-0.0346	0.8561
Cu/Zn Sod	Enterobacteriaceae	0.1989	0.2921
Cu/Zn Sod	Actinomycetales	0.0505	0.791
Cu/Zn Sod	Xanthomonadaceae	-0.1633	0.3887
Cu/Zn Sod	Delftia	0.3143	0.0907
Cu/Zn Sod	Lachnospiraceae	0.1534	0.4184
Cu/Zn Sod	Serratia	-0.0316	0.8682
Cu/Zn Sod	Diversity abundance	-0.0358	0.851
Cu/Zn Sod	Hymen	0.2629	0.153
Cu/Zn Sod	Def-1	0.6081	0.0002
Cu/Zn Sod	Abaecin	0.3156	0.0785
Cu/Zn Sod	GOX	0.7399	0.0001
Cu/Zn Sod	CAT	-0.1964	0.2981
MnSod	Log 16s Copy#	0.2151	0.2536
MnSod	Log 18s Copy#	0.1969	0.297
MnSod	Nosema ceranae	-0.2165	0.2506
MnSod	Diversity	-0.0753	0.7033
MnSod	Lactobacillus Firm5	0.0493	0.8034
MnSod	Lactobacillus Firm4	0.2332	0.2324
MnSod	B. asteroides	0.2042	0.2974
MnSod	S. alvi	-0.0591	0.7651
MnSod	G. apicola	0.1511	0.4429
MnSod	Gilliamella spp.	0.3139	0.1038
MnSod	P. apium	0.3815	0.0452
MnSod	L. kunkeei	0.2761	0.155
MnSod	Enterobacteriaceae	0.3297	0.0867
MnSod	Actinomycetales	0.1612	0.4125
MnSod	Xanthomonadaceae	-0.0915	0.6432
MnSod	Delftia	0.3372	0.0793
MnSod	Lachnospiraceae	0.1249	0.5267
MnSod	Serratia	0.1636	0.4056
MnSod	Diversity abundance	0.1965	0.3163
MnSod	Hymen	0.3722	0.0428
MnSod	Def-1	0.5853	0.0007
MnSod	Abaecin	0.2489	0.1846
MnSod	GOX	0.6129	0.0003
MnSod	CAT	-0.0847	0.6621
MnSod	Cu/Zn Sod	0.7918	0.0001
Vg	Log 16s Copy#	-0.1749	0.4248
Vg	Log 18s Copy#	-0.5553	0.0059
Vg	Nosema ceranae	-0.2075	0.3421
Vg	Diversity	-0.5879	0.0051
Vg	Lactobacillus Firm5	0.3727	0.0961
Vg	Lactobacillus Firm4	-0.0779	0.7371
Vg	B. asteroides	0.1351	0.5594
Vg	S. alvi	-0.2974	0.1904
Vg	G. apicola	-0.0519	0.823
Vg	Gilliamella spp.	-0.2444	0.2856
Vg	P. apium	-0.1818	0.4302
Vg	L. kunkeei	-0.1608	0.4863
Vg	Enterobacteriaceae	-0.1016	0.6611
Vg	Actinomycetales	-0.5411	0.0113
Vg	Xanthomonadaceae	0.0169	0.9421
Vg	Delftia	0.0584	0.8013
Vg	Lachnospiraceae	-0.1082	0.6406
Vg	Serratia	-0.1248	0.5898
Vg	Diversity abundance	-0.6143	0.0031
Vg	Hymen	0.5356	0.0084
Vg	Def-1	0.1433	0.5143
Vg	Abaecin	0.0277	0.9003
Vg	GOX	0.0548	0.8087
Vg	CAT	-0.4117	0.0637
Vg	Cu/Zn Sod	0.1551	0.4797
Vg	MnSod	0.1146	0.6115

## Sheet: CW Correlations
Anderson and Maes 2021, Gut and Colony Microbiota of Honey Bees: Social Immunity and Opportunism Overwinter
Table S4: Correlations among dependent variables from the CW indoor environment in early and late winter.
The column on the right is a subset of that on the left, containing only strong and mild relationships ordered by p-value.
Enterobacteriaceae, Lactobacillus kunkeei, Serratia and Gilliamella spp. contained over 50% zero values and were omitted from the correlation analysis.
CW midguts					CW midguts
Variable	by Variable	Spearman ρ	Prob>|ρ|		Variable	by Variable	Spearman ρ	Prob>|ρ|
Log 18s Copy#	Log 16s Copy#	0.2295	0.2065		Lactobacillus Firm4	Lactobacillus Firm5	0.8178	0.0001
Nosema ceranae	Log 16s Copy#	-0.0565	0.7589		B. asteroides	Lactobacillus Firm4	0.6394	0.0001
Nosema ceranae	Log 18s Copy#	0.0198	0.9144		G. apicola	Lactobacillus Firm5	0.7562	0.0001
Diversity	Log 16s Copy#	-0.0776	0.6834		Delftia	Xanthomonadaceae	0.663	0.0001
Diversity	Log 18s Copy#	0.2423	0.1971		GOX	Def-1	0.8355	0.0001
Diversity	Nosema ceranae	0.1786	0.3449		MnSod	Cu/Zn Sod	0.7581	0.0001
Lactobacillus Firm5	Log 16s Copy#	0.4164	0.0178		Diversity abundance	Delftia	0.5861	0.0004
Lactobacillus Firm5	Log 18s Copy#	0.2097	0.2494		B. asteroides	Lactobacillus Firm5	0.5668	0.0007
Lactobacillus Firm5	Nosema ceranae	-0.3809	0.0315		Diversity abundance	Lactobacillus Firm5	0.5506	0.0011
Lactobacillus Firm5	Diversity	-0.1168	0.5388		Abaecin	Def-1	0.552	0.0013
Lactobacillus Firm4	Log 16s Copy#	0.3757	0.0341		G. apicola	Lactobacillus Firm4	0.5147	0.0026
Lactobacillus Firm4	Log 18s Copy#	0.085	0.6435		Abaecin	Hymen	0.5202	0.0027
Lactobacillus Firm4	Nosema ceranae	-0.3101	0.0841		Diversity abundance	Lactobacillus Firm4	0.504	0.0033
Lactobacillus Firm4	Diversity	-0.2525	0.1782		B. asteroides	Log 16s Copy#	0.4977	0.0038
Lactobacillus Firm4	Lactobacillus Firm5	0.8178	0.0001		GOX	Abaecin	0.5004	0.0041
B. asteroides	Log 16s Copy#	0.4977	0.0038		Def-1	Diversity	0.5079	0.0049
B. asteroides	Log 18s Copy#	0.2511	0.1656		Delftia	Lactobacillus Firm5	0.4787	0.0056
B. asteroides	Nosema ceranae	-0.0704	0.7019		Delftia	Lactobacillus Firm4	0.4762	0.0059
B. asteroides	Diversity	-0.2229	0.2363		Diversity abundance	Actinomycetales	0.4578	0.0084
B. asteroides	Lactobacillus Firm5	0.5668	0.0007		Cu/Zn Sod	Def-1	0.4605	0.0091
B. asteroides	Lactobacillus Firm4	0.6394	0.0001		Cu/Zn Sod	GOX	0.4573	0.0097
S. alvi	Log 16s Copy#	0.4007	0.0231		Cu/Zn Sod	CAT	0.448	0.0115
S. alvi	Log 18s Copy#	0.1329	0.4682		GOX	S. alvi	-0.4477	0.0116
S. alvi	Nosema ceranae	-0.1575	0.3892		Delftia	Log 16s Copy#	0.4388	0.012
S. alvi	Diversity	-0.2009	0.2871		G. apicola	B. asteroides	0.4361	0.0126
S. alvi	Lactobacillus Firm5	0.289	0.1086		G. apicola	S. alvi	0.4341	0.0131
S. alvi	Lactobacillus Firm4	0.2681	0.1379		Delftia	B. asteroides	0.4335	0.0132
S. alvi	B. asteroides	0.4323	0.0135		S. alvi	B. asteroides	0.4323	0.0135
G. apicola	Log 16s Copy#	0.3629	0.0412		Def-1	Hymen	0.4351	0.0144
G. apicola	Log 18s Copy#	0.3658	0.0395		Diversity abundance	Log 16s Copy#	0.4249	0.0154
G. apicola	Nosema ceranae	-0.2636	0.145		Lactobacillus Firm5	Log 16s Copy#	0.4164	0.0178
G. apicola	Diversity	-0.1862	0.3245		Delftia	G. apicola	0.408	0.0204
G. apicola	Lactobacillus Firm5	0.7562	0.0001		Xanthomonadaceae	Lactobacillus Firm5	0.4062	0.0211
G. apicola	Lactobacillus Firm4	0.5147	0.0026		S. alvi	Log 16s Copy#	0.4007	0.0231
G. apicola	B. asteroides	0.4361	0.0126		GOX	Log 18s Copy#	-0.3992	0.0261
G. apicola	S. alvi	0.4341	0.0131		MnSod	CAT	0.3964	0.0273
P. apium	Log 16s Copy#	-0.0601	0.7437		GOX	B. asteroides	-0.3942	0.0282
P. apium	Log 18s Copy#	0.0664	0.7182		Xanthomonadaceae	Log 18s Copy#	0.3871	0.0286
P. apium	Nosema ceranae	-0.0689	0.7077		Diversity abundance	Xanthomonadaceae	0.3835	0.0303
P. apium	Diversity	0.043	0.8217		Lactobacillus Firm5	Nosema ceranae	-0.3809	0.0315
P. apium	Lactobacillus Firm5	0.1878	0.3035		Lactobacillus Firm4	Log 16s Copy#	0.3757	0.0341
P. apium	Lactobacillus Firm4	0.1999	0.2728		CAT	Diversity	-0.3872	0.038
P. apium	B. asteroides	-0.093	0.6128		G. apicola	Log 18s Copy#	0.3658	0.0395
P. apium	S. alvi	-0.1609	0.379		G. apicola	Log 16s Copy#	0.3629	0.0412
P. apium	G. apicola	0.0282	0.8781		GOX	G. apicola	-0.3685	0.0413
Actinomycetales	Log 16s Copy#	0.0935	0.6109		Diversity abundance	G. apicola	0.3596	0.0432
Actinomycetales	Log 18s Copy#	0.1294	0.4803		GOX	Hymen	0.3637	0.0443
Actinomycetales	Nosema ceranae	-0.2977	0.098		Lachnospiraceae	G. apicola	-0.3548	0.0463
Actinomycetales	Diversity	-0.0986	0.6044		MnSod	Def-1	0.356	0.0493
Actinomycetales	Lactobacillus Firm5	0.2386	0.1884
Actinomycetales	Lactobacillus Firm4	0.199	0.2748
Actinomycetales	B. asteroides	-0.0854	0.6421
Actinomycetales	S. alvi	-0.0268	0.8842
Actinomycetales	G. apicola	0.026	0.8876
Actinomycetales	P. apium	0.1353	0.4603
Xanthomonadaceae	Log 16s Copy#	0.3026	0.0923
Xanthomonadaceae	Log 18s Copy#	0.3871	0.0286
Xanthomonadaceae	Nosema ceranae	0.1487	0.4168
Xanthomonadaceae	Diversity	0.0581	0.7605
Xanthomonadaceae	Lactobacillus Firm5	0.4062	0.0211
Xanthomonadaceae	Lactobacillus Firm4	0.288	0.11
Xanthomonadaceae	B. asteroides	0.2106	0.2472
Xanthomonadaceae	S. alvi	-0.0777	0.6726
Xanthomonadaceae	G. apicola	0.3287	0.0663
Xanthomonadaceae	P. apium	0.2736	0.1297
Xanthomonadaceae	Actinomycetales	0.2495	0.1685
Delftia	Log 16s Copy#	0.4388	0.012
Delftia	Log 18s Copy#	-0.0418	0.8204
Delftia	Nosema ceranae	-0.0986	0.5913
Delftia	Diversity	-0.2943	0.1144
Delftia	Lactobacillus Firm5	0.4787	0.0056
Delftia	Lactobacillus Firm4	0.4762	0.0059
Delftia	B. asteroides	0.4335	0.0132
Delftia	S. alvi	0.1645	0.3682
Delftia	G. apicola	0.408	0.0204
Delftia	P. apium	0.11	0.5489
Delftia	Actinomycetales	0.261	0.1491
Delftia	Xanthomonadaceae	0.663	0.0001
Lachnospiraceae	Log 16s Copy#	-0.2546	0.1596
Lachnospiraceae	Log 18s Copy#	-0.0493	0.7886
Lachnospiraceae	Nosema ceranae	0.055	0.7649
Lachnospiraceae	Diversity	0.2342	0.213
Lachnospiraceae	Lactobacillus Firm5	-0.2869	0.1114
Lachnospiraceae	Lactobacillus Firm4	-0.1537	0.4011
Lachnospiraceae	B. asteroides	-0.1381	0.4509
Lachnospiraceae	S. alvi	0.0859	0.6401
Lachnospiraceae	G. apicola	-0.3548	0.0463
Lachnospiraceae	P. apium	0.0304	0.869
Lachnospiraceae	Actinomycetales	-0.0087	0.9622
Lachnospiraceae	Xanthomonadaceae	-0.2239	0.218
Lachnospiraceae	Delftia	-0.2508	0.1662
Diversity abundance	Log 16s Copy#	0.4249	0.0154
Diversity abundance	Log 18s Copy#	-0.0066	0.9714
Diversity abundance	Nosema ceranae	-0.2559	0.1575
Diversity abundance	Diversity	0.1786	0.3449
Diversity abundance	Lactobacillus Firm5	0.5506	0.0011
Diversity abundance	Lactobacillus Firm4	0.504	0.0033
Diversity abundance	B. asteroides	0.1855	0.3094
Diversity abundance	S. alvi	0.134	0.4645
Diversity abundance	G. apicola	0.3596	0.0432
Diversity abundance	P. apium	0.2428	0.1807
Diversity abundance	Actinomycetales	0.4578	0.0084
Diversity abundance	Xanthomonadaceae	0.3835	0.0303
Diversity abundance	Delftia	0.5861	0.0004
Diversity abundance	Lachnospiraceae	-0.0364	0.8431
Hymen	Log 16s Copy#	0.1694	0.3624
Hymen	Log 18s Copy#	-0.079	0.6726
Hymen	Nosema ceranae	0.25	0.175
Hymen	Diversity	0.2635	0.1672
Hymen	Lactobacillus Firm5	-0.127	0.4959
Hymen	Lactobacillus Firm4	-0.1581	0.3957
Hymen	B. asteroides	-0.1881	0.3108
Hymen	S. alvi	-0.2832	0.1226
Hymen	G. apicola	-0.0423	0.8211
Hymen	P. apium	0.2912	0.1119
Hymen	Actinomycetales	-0.0577	0.758
Hymen	Xanthomonadaceae	0.2107	0.2552
Hymen	Delftia	0.1242	0.5056
Hymen	Lachnospiraceae	-0.0669	0.7208
Hymen	Diversity abundance	0.079	0.6726
Def-1	Log 16s Copy#	-0.1786	0.3363
Def-1	Log 18s Copy#	-0.246	0.1823
Def-1	Nosema ceranae	0.2145	0.2465
Def-1	Diversity	0.5079	0.0049
Def-1	Lactobacillus Firm5	-0.1347	0.4701
Def-1	Lactobacillus Firm4	-0.1105	0.5541
Def-1	B. asteroides	-0.2754	0.1337
Def-1	S. alvi	-0.3442	0.0579
Def-1	G. apicola	-0.3032	0.0973
Def-1	P. apium	0.0359	0.8479
Def-1	Actinomycetales	-0.0298	0.8734
Def-1	Xanthomonadaceae	0.0597	0.7498
Def-1	Delftia	-0.0931	0.6182
Def-1	Lachnospiraceae	0.313	0.0865
Def-1	Diversity abundance	0.1641	0.3777
Def-1	Hymen	0.4351	0.0144
Abaecin	Log 16s Copy#	-0.0621	0.74
Abaecin	Log 18s Copy#	-0.2823	0.1239
Abaecin	Nosema ceranae	0.0044	0.9811
Abaecin	Diversity	0.2901	0.1268
Abaecin	Lactobacillus Firm5	-0.0923	0.6213
Abaecin	Lactobacillus Firm4	-0.1121	0.5483
Abaecin	B. asteroides	-0.1536	0.4092
Abaecin	S. alvi	-0.196	0.2907
Abaecin	G. apicola	-0.329	0.0707
Abaecin	P. apium	0.192	0.3008
Abaecin	Actinomycetales	0.2802	0.1268
Abaecin	Xanthomonadaceae	-0.0496	0.791
Abaecin	Delftia	-0.0065	0.9725
Abaecin	Lachnospiraceae	0.1259	0.4999
Abaecin	Diversity abundance	0.1065	0.5687
Abaecin	Hymen	0.5202	0.0027
Abaecin	Def-1	0.552	0.0013
GOX	Log 16s Copy#	-0.3185	0.0807
GOX	Log 18s Copy#	-0.3992	0.0261
GOX	Nosema ceranae	0.0028	0.988
GOX	Diversity	0.2773	0.1452
GOX	Lactobacillus Firm5	-0.0621	0.74
GOX	Lactobacillus Firm4	0.0173	0.9262
GOX	B. asteroides	-0.3942	0.0282
GOX	S. alvi	-0.4477	0.0116
GOX	G. apicola	-0.3685	0.0413
GOX	P. apium	0.1412	0.4487
GOX	Actinomycetales	0.0629	0.7367
GOX	Xanthomonadaceae	0.0079	0.9665
GOX	Delftia	-0.152	0.4143
GOX	Lachnospiraceae	0.2008	0.2787
GOX	Diversity abundance	0.1351	0.4687
GOX	Hymen	0.3637	0.0443
GOX	Def-1	0.8355	0.0001
GOX	Abaecin	0.5004	0.0041
CAT	Log 16s Copy#	-0.1492	0.4231
CAT	Log 18s Copy#	-0.1306	0.4836
CAT	Nosema ceranae	0.0569	0.7613
CAT	Diversity	-0.3872	0.038
CAT	Lactobacillus Firm5	0.2052	0.268
CAT	Lactobacillus Firm4	0.3194	0.0799
CAT	B. asteroides	0.1292	0.4883
CAT	S. alvi	0.1604	0.3887
CAT	G. apicola	0.1444	0.4385
CAT	P. apium	0.0165	0.9296
CAT	Actinomycetales	-0.1597	0.3909
CAT	Xanthomonadaceae	-0.0879	0.6382
CAT	Delftia	-0.1621	0.3836
CAT	Lachnospiraceae	-0.206	0.2662
CAT	Diversity abundance	-0.1895	0.3072
CAT	Hymen	-0.0625	0.7384
CAT	Def-1	0.0359	0.848
CAT	Abaecin	-0.1504	0.4193
CAT	GOX	0.223	0.2279
Cu/Zn Sod	Log 16s Copy#	-0.0911	0.6259
Cu/Zn Sod	Log 18s Copy#	-0.0919	0.6228
Cu/Zn Sod	Nosema ceranae	-0.1036	0.5791
Cu/Zn Sod	Diversity	-0.1153	0.5516
Cu/Zn Sod	Lactobacillus Firm5	0.2391	0.1951
Cu/Zn Sod	Lactobacillus Firm4	0.3238	0.0756
Cu/Zn Sod	B. asteroides	0.03	0.8725
Cu/Zn Sod	S. alvi	0.0238	0.8987
Cu/Zn Sod	G. apicola	0.0915	0.6243
Cu/Zn Sod	P. apium	0.1589	0.3931
Cu/Zn Sod	Actinomycetales	0.1891	0.3083
Cu/Zn Sod	Xanthomonadaceae	-0.1534	0.4099
Cu/Zn Sod	Delftia	-0.1081	0.5628
Cu/Zn Sod	Lachnospiraceae	0.0771	0.6803
Cu/Zn Sod	Diversity abundance	0.0641	0.7319
Cu/Zn Sod	Hymen	0.1867	0.3146
Cu/Zn Sod	Def-1	0.4605	0.0091
Cu/Zn Sod	Abaecin	0.3512	0.0527
Cu/Zn Sod	GOX	0.4573	0.0097
Cu/Zn Sod	CAT	0.448	0.0115
MnSod	Log 16s Copy#	-0.0685	0.7141
MnSod	Log 18s Copy#	-0.0669	0.7205
MnSod	Nosema ceranae	0.1145	0.5396
MnSod	Diversity	-0.0813	0.6751
MnSod	Lactobacillus Firm5	0.1081	0.5628
MnSod	Lactobacillus Firm4	0.25	0.175
MnSod	B. asteroides	0.1458	0.4339
MnSod	S. alvi	0.1568	0.3997
MnSod	G. apicola	-0.0472	0.801
MnSod	P. apium	0.0896	0.6319
MnSod	Actinomycetales	-0.1254	0.5015
MnSod	Xanthomonadaceae	-0.2371	0.199
MnSod	Delftia	-0.1677	0.3671
MnSod	Lachnospiraceae	0.0849	0.6496
MnSod	Diversity abundance	-0.1206	0.5182
MnSod	Hymen	-0.1282	0.4918
MnSod	Def-1	0.356	0.0493
MnSod	Abaecin	0.0827	0.6584
MnSod	GOX	0.2573	0.1624
MnSod	CAT	0.3964	0.0273
MnSod	Cu/Zn Sod	0.7581	0.0001
Vg	Log 16s Copy#	0.0109	0.9536
Vg	Log 18s Copy#	0.0294	0.8751
Vg	Nosema ceranae	-0.0875	0.6397
Vg	Diversity	0.0478	0.8056
Vg	Lactobacillus Firm5	-0.1274	0.4946
Vg	Lactobacillus Firm4	-0.0306	0.87
Vg	B. asteroides	0.1797	0.3335
Vg	S. alvi	0.0267	0.8868
Vg	G. apicola	-0.0698	0.7092
Vg	P. apium	-0.0169	0.9279
Vg	Actinomycetales	-0.35	0.0536
Vg	Xanthomonadaceae	-0.1059	0.5709
Vg	Delftia	-0.1286	0.4904
Vg	Lachnospiraceae	0.1898	0.3064
Vg	Diversity abundance	-0.1738	0.3498
Vg	Hymen	-0.1149	0.5382
Vg	Def-1	-0.1036	0.5791
Vg	Abaecin	-0.231	0.2111
Vg	GOX	-0.1137	0.5425
Vg	CAT	-0.2145	0.2465
Vg	Cu/Zn Sod	-0.0734	0.6948
Vg	MnSod	0.1121	0.5483
