# Supplementary material for: Gut and Colony Microbiota of Honey Bees: Social Immunity and Opportunism Overwinter
Source: Research Square preprint supplement (doi:10.21203/rs.3.rs-1078138/v1), 2021-11-30
Supplement: Supplementary file 2 [file bb3b14695476ee684c9407c6.xlsx]

## Sheet: N. ceranae analysis
Anderson and Maes 2021, Gut and Colony Microbiota of Honey Bees: Social Immunity and Opportunism Overwinter
Table S2. qPCR of Nosema ceranae abundance relative to actin. Comparing ages (Experiment 1, KA samples) and overwintering environment (Experiment 2, WW-CW samples)
Sample ID		N. ceranae
19R-8.1.Mid	Early	-12.4728
19R-8.2.Mid	Early	4.24213
19R-8.3.Mid	Early	12.0008
19R-17.1.Mid	Early	10.1085
19R-17.2.Mid	Early	13.5831
19R-17.3.Mid	Early	1.13926
19S-8.1.Mid	Early	11.9603
19S-8.2.Mid	Early	-3.29019
19S-8.3.Mid	Early	11.5512
19S-17.1.Mid	Early	-2.09211
19S-17.2.Mid	Early	3.37089
19S-17.3.Mid	Early	14.3283
33R-8.1.Mid	Early	-6.42935
33R-8.2.Mid	Early	14.1942
33R-8.3.Mid	Early	-10.6654
33R-17.1.Mid	Early	12.3605
33R-17.2.Mid	Early	12.9052
33R-17.3.Mid	Early	11.459
33S-8.1.Mid	Early	10.5242
33S-8.2.Mid	Early	13.1732
33S-8.3.Mid	Early	15.56
33S-17.1.Mid	Early	13.4213
33S-17.2.Mid	Early	11.7185
33S-17.3.Mid	Early	13.4148
50R-8.1.Mid	Late	11.2953
50R-8.2.Mid	Late	11.2835
50R-8.3.Mid	Late	11.1642
50R-17.1.Mid	Late	11.9724
50R-17.2.Mid	Late	12.8026
50R-17.3.Mid	Late	11.1619
50S-8.1.Mid	Late	10.901
50S-8.2.Mid	Late	8.27526
50S-8.3.Mid	Late	8.11505
50S-17.1.Mid	Late	11.038
50S-17.2.Mid	Late	10.3918
50S-17.3.Mid	Late	8.56785
70R-17.1.Mid	Late	9.43501
70R-17.2.Mid	Late	7.05046
70R-17.3.Mid	Late	5.14228
70R-17.4.Mid	Late	11.1555
70R-17.5.Mid	Late	6.66254
70S-17.1.Mid	Late	11.6807
70S-17.2.Mid	Late	10.973
70S-17.3.Mid	Late	2.2782
70S-17.4.Mid	Late	-2.20545
70S-17.5.Mid	Late	-7.93254
D-80.1	Early WW	8.73535
D-80.2	Early WW	9.06608
D-80.3	Early WW	3.96695
D-80.4	Early WW	4.53101
D-84.1	Early WW	-13.19
D-84.2	Early WW	6.15832
D-84.3	Early WW	7.14119
D-84.4	Early WW	4.13846
D-91.1	Early WW	7.85636
D-91.2	Early WW	9.53777
D-91.3	Early WW	8.08061
D-91.4	Early WW	8.60667
D-94.1	Early WW	1.49774
D-94.2	Early WW	1.36326
D-94.3	Early WW	1.75433
D-94.4	Early WW	8.49762
F-80.1	Late WW	9.51199
F-80.2	Late WW	10.1603
F-80.3	Late WW	8.91869
F-80.4	Late WW	9.83407
F-84.1	Late WW	5.73314
F-84.2	Late WW	5.13589
F-84.3	Late WW	7.11425
F-84.4	Late WW	4.9658
F-91.1	Late WW	8.37753
F-91.2	Late WW	10.126
F-91.3	Late WW	7.07285
F-91.4	Late WW	-10.786
F-94.1	Late WW	12.9933
F-94.2	Late WW	8.36994
F-94.3	Late WW	9.82078
F-94.4	Late WW	14.4883
O-R3.1	Early CW	13.7563
O-R3.2	Early CW	12.4951
O-R3.3	Early CW	12.7965
O-R3.4	Early CW	12.0183
O-R18.1	Early CW	14.523
O-R18.2	Early CW	13.8767
O-R18.3	Early CW	10.121
O-R18.4	Early CW	34.63
O-Y1.1	Early CW	14.2036
O-Y1.2	Early CW	10.517
O-Y1.3	Early CW	-8.88303
O-Y1.4	Early CW	13.8655
O-Y13.1	Early CW	13.1895
O-Y13.2	Early CW	13.4611
O-Y13.3	Early CW	13.8927
O-Y13.4	Early CW	13.3598
F-R3.1	Late CW	11.6185
F-R3.2	Late CW	12.1583
F-R3.3	Late CW	12.4881
F-R3.4	Late CW	13.2714
F-R18.1	Late CW	13.7155
F-R18.2	Late CW	7.22261
F-R18.3	Late CW	15.4891
F-R18.4	Late CW	11.6425
F-Y1.1	Late CW	13.5455
F-Y1.2	Late CW	12.8045
F-Y1.3	Late CW	14.3936
F-Y1.4	Late CW	9.36329
F-Y13.1	Late CW	12.6376
F-Y13.2	Late CW	12.0269
F-Y13.3	Late CW	-6.79633
F-Y13.4	Late CW	14.04
