# Supplementary material for: Gut and Colony Microbiota of Honey Bees: Social Immunity and Opportunism Overwinter
Source: Research Square preprint supplement (doi:10.21203/rs.3.rs-1078138/v1), 2021-11-30
Supplement: Supplementary file 3 [file d90235830b3e9c4454200849.xlsx]

## Sheet: KA Summary
Anderson and Maes 2021, Gut and Colony Microbiota of Honey Bees: Social Immunity and Opportunism Overwinter
Table S1, Experiment 1. Wilcoxon and MANOVA analysis comparing the mouth and midgut microbiotas of known age bees sampled at 19, 33, 50, and 70 days of age overwinter, mid-Dec through mid-Feb.
	Absolute Abundance (Cell # corrected by 16S rRNA genome copy number)																		Relative Abundance Data, corrected for 16S rRNA genome copy number and centered-log transformed.
	Wilcoxon																		MANOVA
	Mouthparts																		Mouthparts
	Wilcoxon Summary																		Manova Summary
	Known Age Mouthparts																		Known Age Pillai's Trace- p < 0.008
		N	Firm5	Firm4	B. asteroides	S. alvi	G. apicola	Gilliamella spp.	P. apium	L. kunkeei	Enterobacteriaceae	Actinomycetales	Xanthomonadaceae	Delftia	Lachnospiraceae	Serratia	DAM			N	Firm5	Firm4	B. asteroides	S. alvi	G. apicola	Gilliamella spp.	P. apium	L. kunkeei	Enterobacteriaceae	Actinomycetales	Xanthomonadaceae	Delftia	Lachnospiraceae	Serratia	DAM
	19 Days	12						Lower				Lower	Higher						19 days	12						Lower			Higher	Lower	Higher
	33 Days	12						Lower				Lower	Higher						33 days	12						Lower			Higher	Lower	Higher
	50 Days	12						Higher				Higher	Lower						50 days	12						Higher			Higher	Higher	Lower
	70 Days	10						Higher				Higher	Lower						70 days	10						Higher			Lower	Higher	Lower
	p		0.1941	0.3774	0.2595	0.7139	0.7224	0.0302	0.5998	0.1949	0.1856	0.0023	0.0001	0.8857	0.7882	0.4152	0.0919		p		0.0557	0.1447	0.2353	0.6522	0.685	0.0058	0.4518	0.1015	0.0572	0.0181	0.0118	0.9456	0.572	0.6056	0.4755
	p-adjusted		0.4176	0.6228	0.4866	0.8335	0.8335	0.151	0.8179	0.4176	0.4176	0.0173	0.0015	0.8857	0.8445	0.6228	0.3446		p-adjusted		0.1716	0.3101	0.4412	0.7339	0.7339	0.087	0.7133	0.2538	0.1716	0.0905	0.0885	0.9456	0.7339	0.7339	0.7133
	Known Age Mouthparts																		Known Age Pillai's Trace- p < 0.01
		N	Firm5	Firm4	B. asteroides	S. alvi	G. apicola	Gilliamella spp.	P. apium	L. kunkeei	Enterobacteriaceae	Actinomycetales	Xanthomonadaceae	Delftia	Lachnospiraceae	Serratia	DAM			N	Firm5	Firm4	B. asteroides	S. alvi	G. apicola	Gilliamella spp.	P. apium	L. kunkeei	Enterobacteriaceae	Actinomycetales	Xanthomonadaceae	Delftia	Lachnospiraceae	Serratia	DAM
	19/33 days	24						Lower				Lower	Higher				Higher		19/33 days	24	Higher	Higher	Higher			Lower				Lower	Higher
	50/70 days	22						Higher				Higher	Lower				Lower		50/70 days	22	Lower	Lower	Lower			Higher				Higher	Lower
	p		0.3118	0.0863	0.0557	0.6601	0.4159	0.003	0.235	0.3557	0.3014	0.0028	0.0001	0.613	0.4286	0.1134	0.0165		p		0.0365	0.0236	0.0492	0.6351	0.5141	0.002	0.1435	0.1949	0.1163	0.0238	0.0077	0.8356	0.3461	0.3067	0.1895
	p-adjusted		0.4677	0.2158	0.1671	0.6601	0.4945	0.015	0.4406	0.485	0.4677	0.015	0.0015	0.6568	0.4945	0.243	0.0619		p-adjusted		0.1095	0.0893	0.123	0.6805	0.5932	0.03	0.2691	0.2924	0.2492	0.0893	0.0578	0.8356	0.4326	0.4182	0.2924
	Midguts																		Midguts
	Wilcoxon Summary																		Manova Summary
	Known Age Midguts																		Known age Pillai's Trace- p < 0.001
		N	Firm5	Firm4	B. asteroides	S. alvi	G. apicola	Gilliamella spp.	P. apium	L. kunkeei	Enterobacteriaceae	Actinomycetales	Xanthomonadaceae	Delftia	Lachnospiraceae	Serratia	DAM			N	Firm5	Firm4	B. asteroides	S. alvi	G. apicola	Gilliamella spp.	P. apium	L. kunkeei	Enterobacteriaceae	Actinomycetales	Xanthomonadaceae	Delftia	Lachnospiraceae	Serratia	DAM
	19 Days	7																	19 Days	7
	33 Days	9	Lower			Lower	Lower						Higher						33 Days	9				Lower							Higher	Higher
	50 Days	12				Higher													50 Days	12				Higher								Lower
	70 Days	10	Higher			Higher	Higher						Lower						70 Days	10				Higher							Lower	Lower
	p		0.0065	0.1341	0.0941	0.0025	0.0225	0.9794	0.2956	0.3755	0.0806	0.5031	0.0233	0.2977	0.345	0.5108	0.3298		p		0.4666	0.2006	0.8853	0.0401	0.8115	0.2298	0.2409	0.5005	0.1337	0.6164	0.0023	0.0015	0.0757	0.3446	0.9378
	p-adjusted		0.0488	0.2874	0.2353	0.0375	0.0874	0.9794	0.4694	0.4694	0.2353	0.5473	0.0874	0.4694	0.4694	0.5473	0.4694		p-adjusted		0.6825	0.4517	0.9378	0.2005	0.9363	0.4517	0.4517	0.6825	0.4011	0.7705	0.0173	0.0173	0.2839	0.5743	0.9378
	Known Age Midguts																		Known age Pillai's Trace- p < 0.003
		N	Firm5	Firm4	B. asteroides	S. alvi	G. apicola	Gilliamella spp.	P. apium	L. kunkeei	Enterobacteriaceae	Actinomycetales	Xanthomonadaceae	Delftia	Lachnospiraceae	Serratia	DAM				Firm5	Firm4	B. asteroides	S. alvi	G. apicola	Gilliamella spp.	P. apium	L. kunkeei	Enterobacteriaceae	Actinomycetales	Xanthomonadaceae	Delftia	Lachnospiraceae	Serratia	DAM
	19/33 days	16	Lower		Lower	Lower	Lower				Lower								19/33 days	16				Lower					Lower		Higher	Higher
	50/70 days	22	Higher		Higher	Higher	Higher				Higher								50/70 days	22				Higher					Higher		Lower	Lower
	p		0.011	0.2143	0.018	0.0002	0.0045	1	0.3748	0.1746	0.0379	0.1745	0.7787	0.2006	0.2169	0.4318	0.1473		p		0.9696	0.9964	0.8242	0.0053	0.4938	0.0815	0.4458	0.8107	0.0292	0.4709	0.0013	0.0011	0.0545	0.6836	0.8322
	p-adjusted		0.055	0.2958	0.0675	0.003	0.0338	1	0.4685	0.2958	0.1137	0.2958	0.8343	0.2958	0.2958	0.4982	0.2958		p-adjusted		0.9964	0.9964	0.9602	0.0265	0.823	0.2038	0.823	0.9602	0.1095	0.823	0.0098	0.0098	0.1635	0.9602	0.9602

## Sheet: KA Mouth Analysis
Anderson and Maes 2021, Gut and Colony Microbiota of Honey Bees: Social Immunity and Opportunism Overwinter
Table S1, Experiment 1. Manova and Wilcoxon results comparing OTU absolute and relative abundance in the mouthparts of known age (KA) samples overwinter; ages 19,33,50 and 70 days.
	MANOVA Test Criteria and F Approximations for the Hypothesis of No Overall Age Effect
	H = Type III SSCP Matrix for Age								The SAS System
	E = Error SSCP Matrix								The GLM Procedure
	S=3 M=5 N=13.5								Class Level Information
	Statistic	Value	F Value	Num DF	Den DF	Pr > F			Class	Levels	Values
	Wilks' Lambda	0.12779	2.07	42	86.793	0.0022			Age	4	19 33 50 70
	Pillai's Trace	1.36265	1.84	42	93	0.0077
	Hotelling-Lawley Trace	3.52676	2.34	42	62.113	0.0011			Number of Observations Read	46
	Roy's Greatest Root	2.51479	5.57	14	31	<.0001			Number of Observations Used	46
	NOTE: F Statistic for Roy's Greatest Root is an upper bound.
	The SAS System									MANOVA on centered log ratios											Wilcoxon on OTU cell number
	The GLM Procedure
	Dependent Variable: Firm5 Firm5
	Source	DF	Sum of Squares	Mean Square	F Value	Pr > F
	Model	3	26.749	8.91633	2.73	0.0557
	Error	42	137.12	3.26477
	Corrected Total	45	163.869
	R-Square	Coeff Var	Root MSE	Firm5 Mean
	0.163234	285.222	1.80687	0.633495
	Source	DF	Type I SS	Mean Square	F Value	Pr > F
	Age	3	26.749	8.91633	2.73	0.0557
	Source	DF	Type III SS	Mean Square	F Value	Pr > F
	Age	3	26.749	8.91633	2.73	0.0557
	The SAS System
	The GLM Procedure
	Dependent Variable: Firm4 Firm4
	Source	DF	Sum of Squares	Mean Square	F Value	Pr > F
	Model	3	20.7682	6.92274	1.9	0.1447
	Error	42	153.225	3.64822
	Corrected Total	45	173.994
	R-Square	Coeff Var	Root MSE	Firm4 Mean
	0.119362	-124.292	1.91003	-1.53673
	Source	DF	Type I SS	Mean Square	F Value	Pr > F
	Age	3	20.7682	6.92274	1.9	0.1447
	Source	DF	Type III SS	Mean Square	F Value	Pr > F
	Age	3	20.7682	6.92274	1.9	0.1447
	The SAS System
	The GLM Procedure
	Dependent Variable: B__asteroides B# asteroides
	Source	DF	Sum of Squares	Mean Square	F Value	Pr > F
	Model	3	14.6039	4.86798	1.47	0.2353
	Error	42	138.672	3.30171
	Corrected Total	45	153.276
	R-Square	Coeff Var	Root MSE	B__asteroides Mean
	0.095279	-205.971	1.81706	-0.88219
	Source	DF	Type I SS	Mean Square	F Value	Pr > F
	Age	3	14.6039	4.86798	1.47	0.2353
	Source	DF	Type III SS	Mean Square	F Value	Pr > F
	Age	3	14.6039	4.86798	1.47	0.2353
	The SAS System
	The GLM Procedure
	Dependent Variable: S__alvi S# alvi
	Source	DF	Sum of Squares	Mean Square	F Value	Pr > F
	Model	3	7.89685	2.63228	0.55	0.6522
	Error	42	201.689	4.80213
	Corrected Total	45	209.586
	R-Square	Coeff Var	Root MSE	S__alvi Mean
	0.037678	-123.903	2.19138	-1.76863
	Source	DF	Type I SS	Mean Square	F Value	Pr > F
	Age	3	7.89685	2.63228	0.55	0.6522
	Source	DF	Type III SS	Mean Square	F Value	Pr > F
	Age	3	7.89685	2.63228	0.55	0.6522
	The SAS System
	The GLM Procedure
	Dependent Variable: G__apicola G# apicola
	Source	DF	Sum of Squares	Mean Square	F Value	Pr > F
	Model	3	6.49511	2.16504	0.5	0.685
	Error	42	182.225	4.3387
	Corrected Total	45	188.72
	R-Square	Coeff Var	Root MSE	G__apicola Mean
	0.034417	591.249	2.08296	0.352298
	Source	DF	Type I SS	Mean Square	F Value	Pr > F
	Age	3	6.49511	2.16504	0.5	0.685
	Source	DF	Type III SS	Mean Square	F Value	Pr > F
	Age	3	6.49511	2.16504	0.5	0.685
	The SAS System
	The GLM Procedure
	Dependent Variable: Gilliamella spp.
	Source	DF	Sum of Squares	Mean Square	F Value	Pr > F
	Model	3	83.1527	27.7176	4.79	0.0058
	Error	42	242.884	5.78294
	Corrected Total	45	326.036
	R-Square	Coeff Var	Root MSE	G__apicola__2_ Mean
	0.255041	-135.818	2.40477	-1.77059
	Source	DF	Type I SS	Mean Square	F Value	Pr > F
	Age	3	83.1527	27.7176	4.79	0.0058
	Source	DF	Type III SS	Mean Square	F Value	Pr > F
	Age	3	83.1527	27.7176	4.79	0.0058
	The SAS System
	The GLM Procedure
	Dependent Variable: P__apium P# apium
	Source	DF	Sum of Squares	Mean Square	F Value	Pr > F
	Model	3	30.8529	10.2843	0.89	0.4518
	Error	42	482.758	11.4942
	Corrected Total	45	513.611
	R-Square	Coeff Var	Root MSE	P__apium Mean
	0.060071	166.447	3.39032	2.03687
	Source	DF	Type I SS	Mean Square	F Value	Pr > F
	Age	3	30.8529	10.2843	0.89	0.4518
	Source	DF	Type III SS	Mean Square	F Value	Pr > F
	Age	3	30.8529	10.2843	0.89	0.4518
	The SAS System
	The GLM Procedure
	Dependent Variable: L__kunkeei L# kunkeei
	Source	DF	Sum of Squares	Mean Square	F Value	Pr > F
	Model	3	68.8899	22.9633	2.21	0.1015
	Error	42	437.121	10.4076
	Corrected Total	45	506.011
	R-Square	Coeff Var	Root MSE	L__kunkeei Mean
	0.136143	-2891.79	3.22609	-0.11156
	Source	DF	Type I SS	Mean Square	F Value	Pr > F
	Age	3	68.8899	22.9633	2.21	0.1015
	Source	DF	Type III SS	Mean Square	F Value	Pr > F
	Age	3	68.8899	22.9633	2.21	0.1015
	The SAS System
	The GLM Procedure
	Dependent Variable: Enterobacteriaceae Enterobacteriaceae
	Source	DF	Sum of Squares	Mean Square	F Value	Pr > F
	Model	3	14.6138	4.87127	2.71	0.0572
	Error	42	75.5331	1.79841
	Corrected Total	45	90.1469
	R-Square	Coeff Var	Root MSE	Enterobacteriaceae Mean
	0.162111	-199.459	1.34105	-0.672341
	Source	DF	Type I SS	Mean Square	F Value	Pr > F
	Age	3	14.6138	4.87127	2.71	0.0572
	Source	DF	Type III SS	Mean Square	F Value	Pr > F
	Age	3	14.6138	4.87127	2.71	0.0572
	The SAS System
	The GLM Procedure
	Dependent Variable: Actinomycetales Actinomycetales
	Source	DF	Sum of Squares	Mean Square	F Value	Pr > F
	Model	3	30.3085	10.1028	3.74	0.0181
	Error	42	113.442	2.70101
	Corrected Total	45	143.751
	R-Square	Coeff Var	Root MSE	Actinomycetales Mean
	0.210841	62.7756	1.64347	2.61802
	Source	DF	Type I SS	Mean Square	F Value	Pr > F
	Age	3	30.3085	10.1028	3.74	0.0181
	Source	DF	Type III SS	Mean Square	F Value	Pr > F
	Age	3	30.3085	10.1028	3.74	0.0181
	The SAS System
	The GLM Procedure
	Dependent Variable: Xanthomonadaceae Xanthomonadaceae
	Source	DF	Sum of Squares	Mean Square	F Value	Pr > F
	Model	3	24.9354	8.3118	4.13	0.0118
	Error	42	84.4799	2.01143
	Corrected Total	45	109.415
	R-Square	Coeff Var	Root MSE	Xanthomonadaceae Mean
	0.227897	48.3193	1.41825	2.93516
	Source	DF	Type I SS	Mean Square	F Value	Pr > F
	Age	3	24.9354	8.3118	4.13	0.0118
	Source	DF	Type III SS	Mean Square	F Value	Pr > F
	Age	3	24.9354	8.3118	4.13	0.0118
	The SAS System
	The GLM Procedure
	Dependent Variable: Delftia Delftia
	Source	DF	Sum of Squares	Mean Square	F Value	Pr > F
	Model	3	0.822003	0.274001	0.12	0.9456
	Error	42	93.0023	2.21434
	Corrected Total	45	93.8243
	R-Square	Coeff Var	Root MSE	Delftia Mean
	0.008761	95.6713	1.48807	1.5554
	Source	DF	Type I SS	Mean Square	F Value	Pr > F
	Age	3	0.822003	0.274001	0.12	0.9456
	Source	DF	Type III SS	Mean Square	F Value	Pr > F
	Age	3	0.822003	0.274001	0.12	0.9456
	The SAS System
	The GLM Procedure
	Dependent Variable: Lachnospiraceae Lachnospiraceae
	Source	DF	Sum of Squares	Mean Square	F Value	Pr > F
	Model	3	3.61359	1.20453	0.68	0.572
	Error	42	74.9157	1.78371
	Corrected Total	45	78.5293
	R-Square	Coeff Var	Root MSE	Lachnospiraceae Mean
	0.046016	-43.1582	1.33556	-3.09456
	Source	DF	Type I SS	Mean Square	F Value	Pr > F
	Age	3	3.61359	1.20453	0.68	0.572
	Source	DF	Type III SS	Mean Square	F Value	Pr > F
	Age	3	3.61359	1.20453	0.68	0.572
	The SAS System
	The GLM Procedure
	Dependent Variable: Serratia Serratia
	Source	DF	Sum of Squares	Mean Square	F Value	Pr > F
	Model	3	6.79724	2.26575	0.62	0.6056
	Error	42	153.346	3.6511
	Corrected Total	45	160.143
	R-Square	Coeff Var	Root MSE	Serratia Mean
	0.042445	-78.1059	1.91078	-2.4464
	Source	DF	Type I SS	Mean Square	F Value	Pr > F
	Age	3	6.79724	2.26575	0.62	0.6056
	Source	DF	Type III SS	Mean Square	F Value	Pr > F
	Age	3	6.79724	2.26575	0.62	0.6056
	The SAS System
	The GLM Procedure
	Dependent Variable: Other Other
	Source	DF	Sum of Squares	Mean Square	F Value	Pr > F
	Model	3	4.68368	1.56123	0.85	0.4755
	Error	42	77.3277	1.84114
	Corrected Total	45	82.0114
	R-Square	Coeff Var	Root MSE	Other Mean
	0.05711	63.0592	1.35688	2.15176
	Source	DF	Type I SS	Mean Square	F Value	Pr > F
	Age	3	4.68368	1.56123	0.85	0.4755
	Source	DF	Type III SS	Mean Square	F Value	Pr > F
	Age	3	4.68368	1.56123	0.85	0.4755

## Sheet: KA Mouth Abundance
Anderson and Maes 2021, Gut and Colony Microbiota of Honey Bees: Social Immunity and Opportunism Overwinter
Table S1, Experiment 1. Absolute abundance of the mouthpart microbiota from overwintering bees aged 19, 33, 50, and 70 days. Values are 16S copy number.
Label	Group	16S total	L. Firm5	L. Firm4	B. asteroides	S. alvi	G. apicola	Gilliamella spp.	P. apium	L. kunkeei	Enterobacteriaceae	Actinomycetales	Xanthomonadaceae	Delftia	Lachnospiraceae	Serratia	Diversity abundance
19R171Mo	19-day-old	13954.5	5670.84	93.6691	130.035	1271.7	2273.4	78.2412	3.30597	1.10199	79.3432	58.4054	3282.83	286.517	1.10199	80.4452	643.562
19R172Mo	19-day-old	13092.1	878.423	1125.3	332.997	1.91378	359.79	3.82755	72.7235	620.063	185.636	273.67	7061.83	252.618	107.171	5.74133	1810.43
19R173Mo	19-day-old	10258.2	901.109	2.58197	61.9674	1.29099	486.702	1.29099	7.74592	40.0206	61.9674	55.5125	6112.83	766.847	1.29099	9.03691	1748
19R81Mo	19-day-old	7772.65	22.3685	82.8464	62.9633	58.821	83.6749	1.65693	44.7371	111.014	53.0217	713.308	4887.94	354.583	0.828464	216.229	1078.66
19R82Mo	19-day-old	9467.37	238.363	0.754312	4.52587	1.50862	351.509	0.754312	66.3795	202.91	220.259	130.496	6922.32	417.889	0.754312	3.01725	905.929
19R83Mo	19-day-old	5884.07	308.714	51.9662	4.40391	41.3968	427.62	0.440391	29.5062	235.169	93.8033	79.2704	3337.73	416.61	0.440391	3.52313	853.478
19S171Mo	19-day-old	372658	979.515	315.973	268.577	1611.46	1990.63	142.188	356575	5908.69	47.3959	837.327	3207.12	363.368	15.7986	15.7986	379.167
19S172Mo	19-day-old	289956	12.8806	12.8806	25.7613	25.7613	51.5225	12.8806	285138	12.8806	38.6419	1043.33	2692.05	77.2838	25.7613	25.7613	759.957
19S173Mo	19-day-old	28394.7	2264.53	141.755	1292.33	379.194	2284.62	1.18129	17569.3	1.18129	14.1755	1130.5	1833.36	680.423	99.2284	1.18129	701.687
19S81Mo	19-day-old	52203.1	3575.44	242.261	384.276	133.661	4.17691	4.17691	40440.9	71.0075	208.846	547.176	5100.01	384.276	62.6537	4.17691	1040.05
19S82Mo	19-day-old	9883.45	2678.52	311.03	34.7622	1.82959	404.339	20.1255	9.14795	128.071	51.2285	1187.4	3421.33	861.737	1.82959	1.82959	770.258
19S83Mo	19-day-old	4461.17	0.495191	0.495191	103.99	0.495191	0.495191	0.990381	4.95191	0.495191	37.1393	415.96	2211.52	446.662	0.495191	5.4471	1231.54
33R171Mo	33-day-old	88520.2	152.436	24.7194	4.1199	4.1199	16.4796	4.1199	83572.2	1816.88	24.7194	898.138	1293.65	296.633	4.1199	70.0383	337.832
33R172Mo	33-day-old	289211	233.824	48.7133	9.74265	9.74265	9.74265	38.9706	267933	16806.1	68.1986	1022.98	1821.88	292.28	97.4265	9.74265	808.64
33R173Mo	33-day-old	15911.3	176.151	0.62025	61.4047	0.62025	3.7215	0.62025	3723.98	5615.74	135.835	870.831	3627.84	421.77	9.30375	0.62025	1262.21
33R81Mo	33-day-old	6575.79	356.907	565.129	145.292	0.308476	134.496	4.01019	75.5767	2.15933	20.9764	771.499	2807.13	608.315	0.308476	154.547	929.131
33R82Mo	33-day-old	9565.19	874.204	270.209	68.8767	64.5418	705.143	0.481655	8.18814	2.88993	135.827	311.631	3655.76	836.635	0.481655	5.29821	2625.02
33R83Mo	33-day-old	10793.4	1672.05	491.32	249.56	212.126	496	1.55975	21.8365	3.11949	37.4339	1640.85	3010.31	658.213	1.55975	126.34	2171.17
33S171Mo	33-day-old	7798.14	33.2472	1.66236	0.831181	0.831181	37.4031	0.831181	4.98709	36.572	11.6365	5754.27	878.558	603.437	0.831181	45.715	387.33
33S172Mo	33-day-old	58677.6	141.525	44.8738	24.1628	3.45183	51.7774	182.947	50669.4	220.917	75.9402	2737.3	1125.3	220.917	17.2591	3.45183	3158.42
33S173Mo	33-day-old	11638	78.8755	1.54658	109.807	1.54658	68.0495	1.54658	400.564	37.1179	63.4097	5105.26	4653.66	388.191	1.54658	1.54658	725.346
33S81Mo	33-day-old	12175.2	3703.39	743.198	635.554	1.14514	2013.16	1.14514	60.6926	1.14514	73.2892	403.09	1158.88	2314.33	1.14514	1.14514	1063.84
33S82Mo	33-day-old	13597.7	1042.89	125.146	156.433	1127.81	3524.95	227.945	131.106	1.48984	41.7154	3311.91	2736.83	403.746	1.48984	13.4085	750.877
33S83Mo	33-day-old	8038.66	22.3972	0.973793	91.5366	32.1352	707.948	31.1614	6.81655	9.73793	170.414	1735.3	3874.72	313.561	0.973793	29.2138	1011.77
50R171Mo	50-day-old	20415.1	43.1727	19.4974	25.068	1.39267	221.434	10658.1	765.968	587.706	94.7015	4640.37	1898.21	689.371	62.6701	1.39267	706.083
50R172Mo	50-day-old	14293.7	684.358	224.172	192.872	274.928	658.98	1284.97	5820.01	5.92152	208.945	435.655	3577.44	392.512	17.7646	0.845931	514.326
50R173Mo	50-day-old	4268.45	2.38728	310.346	2.38728	2.38728	245.889	253.051	28.6473	66.8437	21.4855	615.917	1057.56	1193.64	2.38728	4.77455	460.744
50R81Mo	50-day-old	7714.45	6.18641	0.883773	3.53509	109.588	245.689	2.65132	1878.02	38.886	130.798	2098.96	1908.95	478.121	0.883773	0.883773	810.42
50R82Mo	50-day-old	9890.81	75.0967	15.0193	12.7087	1.15533	9.24267	1.15533	31.194	26.5727	77.4073	785.627	3883.08	337.357	1.15533	3.466	4630.58
50R83Mo	50-day-old	6165.08	13.8639	0.729681	118.938	225.471	180.231	186.798	54.7261	0.729681	126.235	2637.8	2075.21	180.961	12.4046	0.729681	350.247
50S171Mo	50-day-old	47951	84.2071	47.0569	42.1036	156.031	230.331	69.3471	26661.5	15902.8	7.43004	1931.81	495.336	121.357	2.47668	12.3834	2186.91
50S172Mo	50-day-old	55801.2	293.616	2.36787	2.36787	2.36787	9.47148	2.36787	49498	4160.35	4.73574	1167.36	459.367	78.1397	7.10361	2.36787	111.29
50S173Mo	50-day-old	12563.5	364.888	0.823674	243.808	1.64735	555.98	55.1862	2352.41	0.823674	52.7151	4408.3	3168.67	873.095	0.823674	0.823674	483.497
50S81Mo	50-day-old	6442.11	69.7987	7.93167	1.58633	104.698	44.4174	1.58633	36.4857	1.58633	88.8348	3740.58	1000.98	788.408	1.58633	7.93167	545.699
50S82Mo	50-day-old	14447.6	0.849461	0.849461	0.849461	0.849461	97.688	16.9892	67.9568	0.849461	33.129	11619.8	1581.7	386.505	0.849461	27.1827	611.612
50S83Mo	50-day-old	8.41719e+06	274.274	548.548	274.274	548.548	1097.1	8.34643e+06	57597.5	548.548	274.274	7131.12	548.548	274.274	274.274	274.274	1097.1
70R171Mo	70-day-old	10205.4	17.5534	0.428131	0.428131	0.428131	0.428131	448.253	3267.49	23.9753	0.428131	4745.83	546.723	735.529	0.428131	0.856261	416.571
70R172Mo	70-day-old	88952.4	66.2797	5.09844	15.2953	5.09844	5.09844	5.09844	55318	32176.2	5.09844	749.47	219.233	214.134	5.09844	5.09844	158.052
70R173Mo	70-day-old	53399	30.203	15.1015	15.1015	15.1015	30.203	15.1015	20749.5	30776.9	45.3045	785.279	679.568	105.711	30.203	15.1015	90.6091
70R174Mo	70-day-old	6797.73	214.168	0.767628	0.383814	0.383814	0.383814	20.3421	3.07051	47.9767	20.3421	3649.3	1023.63	386.501	0.383814	0.383814	1429.71
70R175Mo	70-day-old	13261.9	45.0492	1.83874	11.0325	1.37906	18.3874	23.444	1.37906	0.459686	51.0252	11437.9	1210.81	198.584	0.459686	0.459686	259.723
70S171Mo	70-day-old	233593	329.934	8.91714	26.7514	62.42	124.84	8.91714	182204	32948.8	133.757	13678.9	2692.98	543.946	62.42	8.91714	757.957
70S172Mo	70-day-old	156283	23717.5	3661.22	5586.43	32250.9	18150	61.4933	9072.63	203.401	42.5723	3467.28	600.742	80.4143	14.1908	59080.9	293.276
70S173Mo	70-day-old	197456	18945.8	65.5564	38678.3	196.669	56837.4	65.5564	458.895	65.5564	65.5564	131.113	131.113	50609.6	65.5564	65.5564	31073.8
70S174Mo	70-day-old	91083.1	456.334	5.74005	48.7904	289.872	464.944	11.4801	47372.6	39327.9	2.87002	1337.43	200.902	792.127	2.87002	2.87002	766.297
70S175Mo	70-day-old	211990	23.6102	5.90255	5.90255	5.90255	212.492	5.90255	120642	79530.9	47.2204	10111.1	838.162	377.763	11.8051	5.90255	165.271

## Sheet: KA Midgut Analysis
Anderson and Maes 2021, Gut and Colony Microbiota of Honey Bees: Social Immunity and Opportunism Overwinter
Table S1, Experiment 1. Manova and Wilcoxon results comparing OTU absolute and relative abundance in the midgut of known age (KA) samples overwinter; ages 19,33,50 and 70 days.
	MANOVA Test Criteria and F Approximations for the Hypothesis of No Overall Age Effect
	H = Type III SSCP Matrix for Age							The SAS System
	E = Error SSCP Matrix							The GLM Procedure
	S=3 M=5 N=9.5							Class Level Information
	Statistic	Value	F Value	Num DF	Den DF	Pr > F		Class	Levels	Values
	Wilks' Lambda	0.0641947	2.29	42	63.061	0.0014		Age	4	19 33 50 70
	Pillai's Trace	1.73895	2.27	42	69	0.0013
	Hotelling-Lawley Trace	4.91363	2.33	42	42.756	0.0034		Number of Observations Read	38
	Roy's Greatest Root	2.90364	4.77	14	23	0.0005		Number of Observations Used	38
	NOTE: F Statistic for Roy's Greatest Root is an upper bound.
										MANOVA on centered log ratios											Wilcoxon on OTU cell number
	The GLM Procedure
	Dependent Variable: Firm5 Firm5
	Source	DF	Sum of Squares	Mean Square	F Value	Pr > F
	Model	3	5.8033	1.93443	0.87	0.4666
	Error	34	75.6713	2.22563
	Corrected Total	37	81.4746
	R-Square	Coeff Var	Root MSE	Firm5 Mean
	0.071228	52.1634	1.49185	2.85996
	Source	DF	Type I SS	Mean Square	F Value	Pr > F
	Age	3	5.8033	1.93443	0.87	0.4666
	Source	DF	Type III SS	Mean Square	F Value	Pr > F
	Age	3	5.8033	1.93443	0.87	0.4666
	The SAS System
	The GLM Procedure
	Dependent Variable: Firm4 Firm4
	Source	DF	Sum of Squares	Mean Square	F Value	Pr > F
	Model	3	13.5011	4.50036	1.63	0.2006
	Error	34	93.8723	2.76095
	Corrected Total	37	107.373
	R-Square	Coeff Var	Root MSE	Firm4 Mean
	0.125739	915.433	1.66161	0.181511
	Source	DF	Type I SS	Mean Square	F Value	Pr > F
	Age	3	13.5011	4.50036	1.63	0.2006
	Source	DF	Type III SS	Mean Square	F Value	Pr > F
	Age	3	13.5011	4.50036	1.63	0.2006
	The SAS System
	The GLM Procedure
	Dependent Variable: B__asteroides B# asteroides
	Source	DF	Sum of Squares	Mean Square	F Value	Pr > F
	Model	3	1.57167	0.523891	0.21	0.8853
	Error	34	82.865	2.4372
	Corrected Total	37	84.4366
	R-Square	Coeff Var	Root MSE	B__asteroides Mean
	0.018614	1038.1	1.56116	0.150387
	Source	DF	Type I SS	Mean Square	F Value	Pr > F
	Age	3	1.57167	0.523891	0.21	0.8853
	Source	DF	Type III SS	Mean Square	F Value	Pr > F
	Age	3	1.57167	0.523891	0.21	0.8853
	The SAS System
	The GLM Procedure
	Dependent Variable: S__alvi S# alvi
	Source	DF	Sum of Squares	Mean Square	F Value	Pr > F
	Model	3	43.383	14.461	3.09	0.0401
	Error	34	159.254	4.68395
	Corrected Total	37	202.637
	R-Square	Coeff Var	Root MSE	S__alvi Mean
	0.214092	167.826	2.16424	1.28958
	Source	DF	Type I SS	Mean Square	F Value	Pr > F
	Age	3	43.383	14.461	3.09	0.0401
	Source	DF	Type III SS	Mean Square	F Value	Pr > F
	Age	3	43.383	14.461	3.09	0.0401
	The SAS System
	The GLM Procedure
	Dependent Variable: G__apicola G# apicola
	Source	DF	Sum of Squares	Mean Square	F Value	Pr > F
	Model	3	2.31902	0.773006	0.32	0.8115
	Error	34	82.3796	2.42293
	Corrected Total	37	84.6986
	R-Square	Coeff Var	Root MSE	G__apicola Mean
	0.02738	40.9887	1.55658	3.79757
	Source	DF	Type I SS	Mean Square	F Value	Pr > F
	Age	3	2.31902	0.773006	0.32	0.8115
	Source	DF	Type III SS	Mean Square	F Value	Pr > F
	Age	3	2.31902	0.773006	0.32	0.8115
	The SAS System
	The GLM Procedure
	Dependent Variable: G__apicola__2_ G# apicola (2)
	Source	DF	Sum of Squares	Mean Square	F Value	Pr > F
	Model	3	51.0115	17.0038	1.51	0.2298
	Error	34	383.158	11.2693
	Corrected Total	37	434.169
	R-Square	Coeff Var	Root MSE	G__apicola__2_ Mean
	0.117492	679.577	3.35698	0.493982
	Source	DF	Type I SS	Mean Square	F Value	Pr > F
	Age	3	51.0115	17.0038	1.51	0.2298
	Source	DF	Type III SS	Mean Square	F Value	Pr > F
	Age	3	51.0115	17.0038	1.51	0.2298
	The SAS System
	The GLM Procedure
	Dependent Variable: P__apium P# apium
	Source	DF	Sum of Squares	Mean Square	F Value	Pr > F
	Model	3	21.538	7.17934	1.47	0.2409
	Error	34	166.415	4.89455
	Corrected Total	37	187.953
	R-Square	Coeff Var	Root MSE	P__apium Mean
	0.114593	267.025	2.21236	0.828523
	Source	DF	Type I SS	Mean Square	F Value	Pr > F
	Age	3	21.538	7.17934	1.47	0.2409
	Source	DF	Type III SS	Mean Square	F Value	Pr > F
	Age	3	21.538	7.17934	1.47	0.2409
	The SAS System
	The GLM Procedure
	Dependent Variable: L__kunkeei L# kunkeei
	Source	DF	Sum of Squares	Mean Square	F Value	Pr > F
	Model	3	13.3171	4.43902	0.8	0.5005
	Error	34	187.752	5.52211
	Corrected Total	37	201.069
	R-Square	Coeff Var	Root MSE	L__kunkeei Mean
	0.066231	-948.429	2.34992	-0.247769
	Source	DF	Type I SS	Mean Square	F Value	Pr > F
	Age	3	13.3171	4.43902	0.8	0.5005
	Source	DF	Type III SS	Mean Square	F Value	Pr > F
	Age	3	13.3171	4.43902	0.8	0.5005
	The SAS System
	The GLM Procedure
	Dependent Variable: Enterobacteriaceae Enterobacteriaceae
	Source	DF	Sum of Squares	Mean Square	F Value	Pr > F
	Model	3	74.9339	24.978	1.99	0.1337
	Error	34	426.326	12.539
	Corrected Total	37	501.26
	R-Square	Coeff Var	Root MSE	Enterobacteriaceae Mean
	0.149491	-1453.96	3.54105	-0.243545
	Source	DF	Type I SS	Mean Square	F Value	Pr > F
	Age	3	74.9339	24.978	1.99	0.1337
	Source	DF	Type III SS	Mean Square	F Value	Pr > F
	Age	3	74.9339	24.978	1.99	0.1337
	The SAS System
	The GLM Procedure
	Dependent Variable: Actinomycetales Actinomycetales
	Source	DF	Sum of Squares	Mean Square	F Value	Pr > F
	Model	3	3.5437	1.18123	0.6	0.6164
	Error	34	66.4074	1.95316
	Corrected Total	37	69.9511
	R-Square	Coeff Var	Root MSE	Actinomycetales Mean
	0.05066	-89.2866	1.39756	-1.56525
	Source	DF	Type I SS	Mean Square	F Value	Pr > F
	Age	3	3.5437	1.18123	0.6	0.6164
	Source	DF	Type III SS	Mean Square	F Value	Pr > F
	Age	3	3.5437	1.18123	0.6	0.6164
	The SAS System
	The GLM Procedure
	Dependent Variable: Xanthomonadaceae Xanthomonadaceae
	Source	DF	Sum of Squares	Mean Square	F Value	Pr > F
	Model	3	18.1608	6.05361	5.94	0.0023
	Error	34	34.6677	1.01964
	Corrected Total	37	52.8286
	R-Square	Coeff Var	Root MSE	Xanthomonadaceae Mean
	0.343769	-108.052	1.00977	-0.93452
	Source	DF	Type I SS	Mean Square	F Value	Pr > F
	Age	3	18.1608	6.05361	5.94	0.0023
	Source	DF	Type III SS	Mean Square	F Value	Pr > F
	Age	3	18.1608	6.05361	5.94	0.0023
	The SAS System
	The GLM Procedure
	Dependent Variable: Delftia Delftia
	Source	DF	Sum of Squares	Mean Square	F Value	Pr > F
	Model	3	24.3337	8.11124	6.42	0.0015
	Error	34	42.9631	1.26362
	Corrected Total	37	67.2968
	R-Square	Coeff Var	Root MSE	Delftia Mean
	0.361588	-63.5195	1.12411	-1.76971
	Source	DF	Type I SS	Mean Square	F Value	Pr > F
	Age	3	24.3337	8.11124	6.42	0.0015
	Source	DF	Type III SS	Mean Square	F Value	Pr > F
	Age	3	24.3337	8.11124	6.42	0.0015
	The SAS System
	The GLM Procedure
	Dependent Variable: Lachnospiraceae Lachnospiraceae
	Source	DF	Sum of Squares	Mean Square	F Value	Pr > F
	Model	3	7.9039	2.63463	2.5	0.0757
	Error	34	35.7803	1.05236
	Corrected Total	37	43.6842
	R-Square	Coeff Var	Root MSE	Lachnospiraceae Mean
	0.180933	-37.1062	1.02585	-2.76463
	Source	DF	Type I SS	Mean Square	F Value	Pr > F
	Age	3	7.9039	2.63463	2.5	0.0757
	Source	DF	Type III SS	Mean Square	F Value	Pr > F
	Age	3	7.9039	2.63463	2.5	0.0757
	The SAS System
	The GLM Procedure
	Dependent Variable: Serratia Serratia
	Source	DF	Sum of Squares	Mean Square	F Value	Pr > F
	Model	3	10.6188	3.53959	1.15	0.3446
	Error	34	105.022	3.08887
	Corrected Total	37	115.64
	R-Square	Coeff Var	Root MSE	Serratia Mean
	0.091826	-69.6654	1.75752	-2.5228
	Source	DF	Type I SS	Mean Square	F Value	Pr > F
	Age	3	10.6188	3.53959	1.15	0.3446
	Source	DF	Type III SS	Mean Square	F Value	Pr > F
	Age	3	10.6188	3.53959	1.15	0.3446
	The SAS System
	The GLM Procedure
	Dependent Variable: Other Other
	Source	DF	Sum of Squares	Mean Square	F Value	Pr > F
	Model	3	1.29838	0.432792	0.14	0.9378
	Error	34	108.178	3.1817
	Corrected Total	37	109.476
	R-Square	Coeff Var	Root MSE	Other Mean
	0.01186	399.311	1.78373	0.446702
	Source	DF	Type I SS	Mean Square	F Value	Pr > F
	Age	3	1.29838	0.432792	0.14	0.9378
	Source	DF	Type III SS	Mean Square	F Value	Pr > F
	Age	3	1.29838	0.432792	0.14	0.9378

## Sheet: KA Midgut Abundance
Anderson and Maes 2021, Gut and Colony Microbiota of Honey Bees: Social Immunity and Opportunism Overwinter
Table S1, Experiment 1. Absolute abundance of the mindgut microbiota from overwintering bees aged 19, 33, 50, and 70 days. Values are 16S copy number.
Label	Group	16s Copy#	L. Firm5	L. Firm4	B. asteroides	S. alvi	G. apicola	Gilliamella spp.	P. apium	L. kunkeei	Enterobacteriaceae	Actinomycetales	Xanthomonadaceae	Delftia	Lachnospiraceae	Serratia	Diversity abundance
19R173M	19-day-old	5.66593e+07	38777.5	17626.2	1762.62	24676.6	51115.8	5.65165e+07	0	0	0	0	1762.62	0	0	0	7050.46
19R81M	19-day-old	4.89933e+06	215195	6811.93	13004.6	292913	4.26644e+06	48612.4	13004.6	1238.53	0	2786.7	3715.6	4025.23	309.633	0	31273
19S171M	19-day-old	1.32564e+07	74628.8	3553.75	888.438	32872.2	5.49232e+06	4442.19	7.62102e+06	12438.1	1776.88	0	3553.75	0	0	7995.94	888.438
19S172M	19-day-old	1.6477e+06	165238	13927.3	7560.55	0	38996.5	9948.1	1.35861e+06	3680.8	0	2984.43	5073.53	1094.29	198.962	198.962	40190.3
19S173M	19-day-old	2.41802e+06	821455	223741	103049	369634	839937	140.013	37383.4	6720.62	140.013	700.064	2660.24	2940.27	2380.22	420.039	6720.62
19S81M	19-day-old	541225	364157	33490.4	1874.16	0	42290.8	14545.1	52924.7	3463.12	325.941	3707.58	1874.16	2851.98	6518.82	0	13200.6
19S83M	19-day-old	1.86951e+06	1.27448e+06	21802.2	164346	0	381221	4972.44	9434.89	127.499	254.997	1529.98	5864.93	254.997	509.994	0	4717.44
33R172M	33-day-old	2.71584e+07	49743.1	1963.54	4581.6	53015.7	64797	2.67121e+07	221880	38616.4	1309.03	1963.54	3272.57	1309.03	0	0	3927.09
33R173M	33-day-old	3.98133e+07	25880.2	16345.4	5448.46	2724.23	14983.3	2.04794e+07	2724.23	1.92508e+07	2724.23	0	4086.34	1362.11	0	0	6810.57
33R82M	33-day-old	3.11861e+07	70781.6	3011.98	2258.99	22589.9	340354	3.0738e+07	0	0	752.996	0	4517.97	1505.99	0	0	2258.99
33R83M	33-day-old	405857	91937.8	4691.1	9805.16	60138.3	215483	1345.81	1499.61	1422.71	307.613	0	6382.97	2883.87	38.4516	115.355	9805.16
33S171M	33-day-old	700479	74804.5	637.611	2422.92	40144	572192	204.035	2065.86	3060.53	204.035	0	2830.99	1147.7	0	51.0089	714.124
33S172M	33-day-old	1.25023e+06	136713	4338.24	2462.24	5276.23	55107.3	0	131085	30367.7	117.25	16415	21925.7	5745.23	468.999	468.999	839742
33S173M	33-day-old	332038	7846.24	1569.25	10699.4	71.3294	35094.1	0	71115.4	14051.9	285.318	4137.11	7988.89	14408.5	1283.93	427.976	163059
33S82M	33-day-old	2.47861e+06	128207	3000.94	4167.98	204398	648704	49015.4	5001.57	0	1.36676e+06	1833.91	18839.3	10169.9	333.438	1333.75	36844.9
33S83M	33-day-old	3.15868e+06	160149	9725.67	5835.4	216.126	2.66029e+06	304521	2161.26	0	10590.2	0	2809.64	1512.88	0	0	864.504
50R171M	50-day-old	1.38303e+07	161085	74150.4	14063	139352	9.89268e+06	159807	681416	1.91129e+06	6392.27	255691	7670.73	1278.45	20455.3	2556.91	502433
50R172M	50-day-old	5.79562e+06	1.34716e+06	138444	118666	390229	1.08017e+06	268520	705911	82914.1	82153.4	174196	64657.8	14452.9	6846.12	0	1.3213e+06
50R173M	50-day-old	1.2818e+07	5.73351e+06	887450	991634	2.13879e+06	2.86996e+06	16609	377.478	6039.64	3019.82	4529.73	6039.64	754.955	0	0	159296
50R81M	50-day-old	5.65683e+07	73676.7	13195.8	38487.9	203436	647696	1099.65	1099.65	0	5.55853e+07	0	0	2199.31	0	0	2199.31
50R82M	50-day-old	669752	39733.6	2822.2	1559.64	3787.69	84888.8	20720.9	3119.27	0	57483.7	148.537	3936.22	23765.9	74.2684	9209.28	418502
50R83M	50-day-old	2.57536e+08	382801	29828.7	9942.89	343030	879946	39771.6	9942.89	0	2.55836e+08	0	4971.45	0	0	0	0
50S171M	50-day-old	1.66742e+06	72255.1	3176.05	794.012	79665.8	634415	3440.72	174683	656912	264.671	7675.45	8734.13	1588.02	0	0	23820.3
50S172M	50-day-old	9.29943e+06	3.49561e+06	1.8342e+06	368800	688083	2.75697e+06	1031.61	92844.8	14442.5	515.804	1031.61	515.804	0	0	0	45390.8
50S173M	50-day-old	2.73695e+06	24605.8	2139.63	14620.8	54560.6	2.18243e+06	12481.2	284571	27815.2	0	54917.2	7488.71	2139.63	0	0	69181.5
50S81M	50-day-old	445696	126229	3381.3	4651.62	104241	191183	4782.39	1980.21	149.45	653.842	429.668	4091.18	261.537	0	0	3661.52
50S82M	50-day-old	1.93909e+08	1.81895e+06	145965	44912.3	1.90877e+06	6.33263e+06	22456.1	33684.2	33684.2	1.83556e+08	0	11228.1	0	0	0	0
50S83M	50-day-old	2.94081e+07	325997	94579.4	12074	48295.9	106653	2.88145e+07	0	0	0	0	6036.98	0	0	0	0
70R171M	70-day-old	9.21561e+08	3.57518e+07	1.22858e+06	2.45717e+06	1.10573e+07	2.9916e+07	860008	122858	0	8.39921e+08	0	0	0	0	0	245717
70R172M	70-day-old	4.65452e+06	190526	1761.41	74272.7	747718	2.14862e+06	63410.7	1.02191e+06	241606	67227.1	7632.77	4109.95	0	293.568	0	85428.3
70R173M	70-day-old	1.29045e+07	233598	125924	108587	435259	1.98011e+06	33762.2	579433	343097	2.86888e+06	143261	2737.48	4562.47	84861.9	5.25505e+06	705357
70R174M	70-day-old	915116	79976.4	1307.52	3341.43	6755.5	200413	81429.2	95230.8	36828.4	98790.1	5665.9	3995.19	799.038	726.398	218936	80920.7
70R175M	70-day-old	2.81667e+08	3.22943e+06	504599	100920	2.32116e+06	1.21104e+07	100920	0	0	2.61786e+08	100920	0	100920	0	0	1.31196e+06
70S171M	70-day-old	2.32769e+06	396393	351.88	21640.6	136354	1.55971e+06	0	132659	62458.7	0	6333.84	2639.1	351.88	175.94	0	8621.06
70S172M	70-day-old	8.26171e+06	3.23394e+06	1.46234e+06	402577	411908	2.24572e+06	2221.72	10664.3	12441.7	440346	888.69	2221.72	0	0	33770.2	2666.07
70S173M	70-day-old	3.28136e+07	6.55137e+06	1.50785e+06	699569	4.91116e+06	1.6265e+07	18907.3	1.88127e+06	869734	0	0	4726.82	42541.4	0	0	61448.6
70S174M	70-day-old	1.67262e+06	409386	806.274	4938.43	56842.3	1.16345e+06	403.137	19149	5744.7	100.784	1108.63	3023.53	100.784	0	0	7558.82
70S175M	70-day-old	1.12742e+06	428066	2901.1	740.706	84872.6	527198	1172.78	38763.6	30554.1	864.157	493.804	3641.81	555.53	0	123.451	7468.79

## Sheet: WW-CW Summary
Anderson and Maes 2021, Gut and Colony Microbiota of Honey Bees: Social Immunity and Opportunism Overwinter
Table S1, Experiment 2. Wilcoxon and MANOVA analysis comparing colonies overwintered outdoors in a warm southern climate (WW) to colonies overwintered indoors at 7°C and 25% RH (CW).
	Absolute Abundance (Cell # normalized by 16S rRNA genome copy number)														Higher	Lower		Relative Abundance Data, corrected for 16S rRNA genome copy number and centered-log transformed.
	Wilcoxon																	MANOVA
	Comparison of early and late winter midguts within treatment																	Comparison of early and late winter midguts within treatment
	WW outdoors																	WW outdoors- Pillai's Trace- p < 0.0001
		L. Firm5	L. Firm4	B. asteroides	S. alvi	G. apicola	Gilliamella spp.	P. apium	L. kunkeei	Enterobacteriaceae	Actinomycetales	Xanthomonadaceae	Delftia	Lachnospiraceae	Serratia	DAM			L. Firm5	L. Firm4	B. asteroides	S. alvi	G. apicola	Gilliamella spp.	P. apium	L. kunkeei	Enterobacteriaceae	Actinomycetales	Xanthomonadaceae	Delftia	Lachnospiraceae	Serratia	DAM
	Early					Lower	Lower	Lower		Lower	Lower	Higher				Lower		Early	Higher	Higher				Lower			Lower	Lower	Higher	Higher	Higher	Higher
	Late					Higher	Higher	Higher		Higher	Higher	Lower						Late	Lower	Lower				Higher			Higher	Higher	Lower	Lower	Lower	Lower
	p	0.6776	0.5606	0.9337	0.4296	0.01	0.0001	0.0002	0.1566	0.0001	0.002	0.0125	0.5606	0.2086	0.5051	0.004		p	0.0054	0.0161	0.0529	0.3163	0.5881	0.0001	0.0522	0.7259	0.0001	0.0182	0.0001	0.0005	0.0232	0.0036	0.911
	p-adjusted	0.726	0.6468	0.9337	0.6444	0.025	0.0008	0.001	0.2936	0.0008	0.0075	0.0268	0.6468	0.3477	0.6468	0.012		p-adjusted	0.0135	0.0341	0.0721	0.3954	0.6786	0.0005	0.0721	0.7778	0.0005	0.0341	0.0005	0.0019	0.0387	0.0108	0.911
	CW indoors																	CW indoors Pillai's Trace- p < 0.009
		L. Firm5	L. Firm4	B. asteroides	S. alvi	G. apicola	Gilliamella spp.	P. apium	L. kunkeei	Enterobacteriaceae	Actinomycetales	Xanthomonadaceae	Delftia	Lachnospiraceae	Serratia	DAM			L. Firm5	L. Firm4	B. asteroides	S. alvi	G. apicola	Gilliamella spp.	P. apium	L. kunkeei	Enterobacteriaceae	Actinomycetales	Xanthomonadaceae	Delftia	Lachnospiraceae	Serratia	DAM
	Early								Higher									Early	Lower	Lower						Higher					Higher		Higher
	Late		Higher						Lower									Late	Higher	Higher						Lower					Lower		Lower
	p	0.0704	0.0237	0.0797	0.1045	0.2278	0.3469	0.7918	0.0276	0.1406	0.1871	0.5847	0.7345	0.0861	0.8349	0.4287		p	0.0118	0.0023	0.0814	0.1614	0.21	0.9911	0.4978	0.0014	0.1019	0.6844	0.3246	0.6798	0.0033	0.8307	0.0104
	p-adjusted	0.2583	0.207	0.2583	0.2613	0.3797	0.5204	0.8349	0.207	0.3013	0.3508	0.7309	0.8349	0.2583	0.8349	0.5846		p-adjusted	0.0354	0.0165	0.2035	0.3026	0.35	0.9911	0.6788	0.0165	0.2184	0.7897	0.4869	0.7897	0.0165	0.89	0.0354
	Comparison of early and late winter midguts between treatment																	Comparison of early and late winter midguts between treatment
	Early Midgut- WW/CW Wilcoxon																	Early Midgut CW/WW- Pillai's Trace- p < 0.001
		L. Firm5	L. Firm4	B. asteroides	S. alvi	G. apicola	Gilliamella sp.	Bo. Apis	L. kunkeei	Enterobacteriaceae	Actinomycetales	Xanthomonadaceae	Delftia	Lachnospiraceae	Serratia	DAM			L. Firm5	L. Firm4	B. asteroides	S. alvi	G. apicola	Gilliamella spp.	P. apium	L. kunkeei	Enterobacteriaceae	Actinomycetales	Xanthomonadaceae	Delftia	Lachnospiraceae	Serratia	DAM
	WW	Higher		Higher							Lower		Lower			Lower		WW	Higher		Higher							Lower		Lower			Lower
	CW	Lower		Lower							Higher		Higher			Higher		CW	Lower		Lower							Higher		Higher			Higher
	p	0.0168	0.2706	0.0134	0.0923	0.3714	0.8192	0.9834	0.6033	0.5467	0.0065	0.0643	0.0291	0.2201	0.4669	0.0001		p	0.005	0.3279	0.013	0.0867	0.4591	0.7849	0.7193	0.2173	0.8399	0.0029	0.1359	0.0169	0.5167	0.4351	0.0001
	p-adjusted	0.063	0.451	0.063	0.1978	0.5571	0.8777	0.9834	0.6961	0.6834	0.0488	0.1608	0.0873	0.4127	0.6367	0.0015		p-adjusted	0.025	0.5465	0.0488	0.2168	0.626	0.8399	0.83	0.4074	0.8399	0.0218	0.2912	0.0507	0.6459	0.626	0.0015
	Late Midgut- WW/CW Wilcoxon																	Late Midgut CW/WW- Pillai's Trace- p < 0.001
		L. Firm5	L. Firm4	B. asteroides	S. alvi	G. apicola	Gilliamella sp.	Bo. Apis	L. kunkeei	Enterobacteriaceae	Actinomycetales	Xanthomonadaceae	Delftia	Lachnospiraceae	Serratia	DAM			L. Firm5	L. Firm4	B. asteroides	S. alvi	G. apicola	Gilliamella spp.	P. apium	L. kunkeei	Enterobacteriaceae	Actinomycetales	Xanthomonadaceae	Delftia	Lachnospiraceae	Serratia	DAM
	WW	Lower	Lower				Higher	Higher	Higher	Higher		Lower	Lower	Lower	Lower	Lower		WW	Lower	Lower						Higher	Higher		Lower	Lower		Lower	Lower
	CW	Higher	Higher				Lower	Lower	Lower	Lower		Higher	Higher	Higher	Higher	Higher		CW	Higher	Higher				Lower		Lower	Lower		Higher	Higher		Higher	Higher
	p	0.0205	0.0001	0.0621	0.4178	0.9249	0.0001	0.0332	0.0002	0.0001	0.1576	0.0001	0.0001	0.0275	0.007	0.0063		p	0.0134	0.0001	0.1842	0.3717	0.9068	0.0001	0.0329	0.0001	0.0001	0.2004	0.0001	0.0001	0.0694	0.0113	0.0044
	p-adjusted	0.0342	0.0003	0.0776	0.4476	0.9249	0.0003	0.0453	0.0005	0.0003	0.1818	0.0003	0.0003	0.0413	0.0131	0.0131		p-adjusted	0.0223	0.0003	0.2303	0.3983	0.9068	0.0003	0.0494	0.0003	0.0003	0.2312	0.0003	0.0003	0.0946	0.0212	0.0094

## Sheet: WW-Midgut Analysis
Anderson and Maes 2021, Gut and Colony Microbiota of Honey Bees: Social Immunity and Opportunism Overwinter
Table S1, Experiment 2. Manova and Wilcoxon results comparing OTU absolute and relative abundance in the midgut of warm winter outdoor samples in early and late winter
MANOVA Test Criteria and Exact F Statistics for the Hypothesis of No Overall Season Effect							The SAS System
H = Type III SSCP Matrix for Season
E = Error SSCP Matrix							The GLM Procedure
S=1 M=6 N=6.5							Class Level Information
Statistic	Value	F Value	Num DF	Den DF	Pr > F		Class	Levels	Values
Wilks' Lambda	0.104713	9.16	14	15	<.0001		Season	2	Post-overwintering Pre-overwinter
Pillai's Trace	0.895287	9.16	14	15	<.0001
Hotelling-Lawley Trace	8.54989	9.16	14	15	<.0001		Number of Observations Read	30
Roy's Greatest Root	8.54989	9.16	14	15	<.0001		Number of Observations Used	30
The GLM Procedure								MANOVA on centered log ratios											Wilcoxon on OTU cell number
Dependent Variable: Firm5 Firm5
Source	DF	Sum of Squares	Mean Square	F Value	Pr > F
Model	1	21.4469	21.4469	9.07	0.0054
Error	28	66.173	2.36332
Corrected Total	29	87.6199
R-Square	Coeff Var	Root MSE	Firm5 Mean
0.244772	59.6321	1.53731	2.57799
Source	DF	Type I SS	Mean Square	F Value	Pr > F
Season	1	21.4469	21.4469	9.07	0.0054
Source	DF	Type III SS	Mean Square	F Value	Pr > F
Season	1	21.4469	21.4469	9.07	0.0054
The SAS System
The GLM Procedure
Dependent Variable: Firm4 Firm4
Source	DF	Sum of Squares	Mean Square	F Value	Pr > F
Model	1	12.9053	12.9053	6.56	0.0161
Error	28	55.0418	1.96578
Corrected Total	29	67.947
R-Square	Coeff Var	Root MSE	Firm4 Mean
0.189932	-5586.93	1.40206	-0.025095
Source	DF	Type I SS	Mean Square	F Value	Pr > F
Season	1	12.9053	12.9053	6.56	0.0161
Source	DF	Type III SS	Mean Square	F Value	Pr > F
Season	1	12.9053	12.9053	6.56	0.0161
The SAS System
The GLM Procedure
Dependent Variable: B__asteroides B# asteroides
Source	DF	Sum of Squares	Mean Square	F Value	Pr > F
Model	1	13.8804	13.8804	4.09	0.0529
Error	28	95.0871	3.39597
Corrected Total	29	108.967
R-Square	Coeff Var	Root MSE	B__asteroides Mean
0.127381	-1880.36	1.84282	-0.098003
Source	DF	Type I SS	Mean Square	F Value	Pr > F
Season	1	13.8804	13.8804	4.09	0.0529
Source	DF	Type III SS	Mean Square	F Value	Pr > F
Season	1	13.8804	13.8804	4.09	0.0529
The SAS System
The GLM Procedure
Dependent Variable: S__alvi S# alvi
Source	DF	Sum of Squares	Mean Square	F Value	Pr > F
Model	1	3.85603	3.85603	1.04	0.3163
Error	28	103.71	3.70394
Corrected Total	29	107.566
R-Square	Coeff Var	Root MSE	S__alvi Mean
0.035848	594.437	1.92456	0.323762
Source	DF	Type I SS	Mean Square	F Value	Pr > F
Season	1	3.85603	3.85603	1.04	0.3163
Source	DF	Type III SS	Mean Square	F Value	Pr > F
Season	1	3.85603	3.85603	1.04	0.3163
The SAS System
The GLM Procedure
Dependent Variable: G__apicola G# apicola
Source	DF	Sum of Squares	Mean Square	F Value	Pr > F
Model	1	0.982732	0.982732	0.3	0.5881
Error	28	91.682	3.27436
Corrected Total	29	92.6647
R-Square	Coeff Var	Root MSE	G__apicola Mean
0.010605	63.0469	1.80952	2.87011
Source	DF	Type I SS	Mean Square	F Value	Pr > F
Season	1	0.982732	0.982732	0.3	0.5881
Source	DF	Type III SS	Mean Square	F Value	Pr > F
Season	1	0.982732	0.982732	0.3	0.5881
The SAS System
The GLM Procedure
Dependent Variable: Gilliamella spp.
Source	DF	Sum of Squares	Mean Square	F Value	Pr > F
Model	1	129.461	129.461	29.04	<.0001
Error	28	124.821	4.45789
Corrected Total	29	254.282
R-Square	Coeff Var	Root MSE	Gilliamella spp
0.509123	-289.653	2.11137	-0.728933
Source	DF	Type I SS	Mean Square	F Value	Pr > F
Season	1	129.461	129.461	29.04	<.0001
Source	DF	Type III SS	Mean Square	F Value	Pr > F
Season	1	129.461	129.461	29.04	<.0001
The SAS System
The GLM Procedure
Dependent Variable: P__apium P# apium (Bombella apis)
Source	DF	Sum of Squares	Mean Square	F Value	Pr > F
Model	1	10.4649	10.4649	4.11	0.0522
Error	28	71.2937	2.5462
Corrected Total	29	81.7586
R-Square	Coeff Var	Root MSE	P__apium Mean
0.127997	110.656	1.59568	1.44202
Source	DF	Type I SS	Mean Square	F Value	Pr > F
Season	1	10.4649	10.4649	4.11	0.0522
Source	DF	Type III SS	Mean Square	F Value	Pr > F
Season	1	10.4649	10.4649	4.11	0.0522
The SAS System
The GLM Procedure
Dependent Variable: L__kunkeei L# kunkeei
Source	DF	Sum of Squares	Mean Square	F Value	Pr > F
Model	1	0.779726	0.779726	0.13	0.7259
Error	28	174.137	6.21917
Corrected Total	29	174.916
R-Square	Coeff Var	Root MSE	L__kunkeei Mean
0.004458	-816.632	2.49383	-0.305379
Source	DF	Type I SS	Mean Square	F Value	Pr > F
Season	1	0.779726	0.779726	0.13	0.7259
Source	DF	Type III SS	Mean Square	F Value	Pr > F
Season	1	0.779726	0.779726	0.13	0.7259
The SAS System
The GLM Procedure
Dependent Variable: Enterobacteriaceae Enterobacteriaceae
Source	DF	Sum of Squares	Mean Square	F Value	Pr > F
Model	1	173.385	173.385	22.79	<.0001
Error	28	213.025	7.60803
Corrected Total	29	386.41
R-Square	Coeff Var	Root MSE	Enterobacteriaceae Mean
0.448708	582.197	2.75827	0.473769
Source	DF	Type I SS	Mean Square	F Value	Pr > F
Season	1	173.385	173.385	22.79	<.0001
Source	DF	Type III SS	Mean Square	F Value	Pr > F
Season	1	173.385	173.385	22.79	<.0001
The SAS System
The GLM Procedure
Dependent Variable: Actinomycetales Actinomycetales
Source	DF	Sum of Squares	Mean Square	F Value	Pr > F
Model	1	18.2979	18.2979	6.29	0.0182
Error	28	81.3982	2.90708
Corrected Total	29	99.6961
R-Square	Coeff Var	Root MSE	Actinomycetales Mean
0.183537	-844.111	1.70501	-0.20199
Source	DF	Type I SS	Mean Square	F Value	Pr > F
Season	1	18.2979	18.2979	6.29	0.0182
Source	DF	Type III SS	Mean Square	F Value	Pr > F
Season	1	18.2979	18.2979	6.29	0.0182
The SAS System
The GLM Procedure
Dependent Variable: Xanthomonadaceae Xanthomonadaceae
Source	DF	Sum of Squares	Mean Square	F Value	Pr > F
Model	1	52.5199	52.5199	40.58	<.0001
Error	28	36.242	1.29436
Corrected Total	29	88.7619
R-Square	Coeff Var	Root MSE	Xanthomonadaceae Mean
0.591694	-68.0916	1.1377	-1.67084
Source	DF	Type I SS	Mean Square	F Value	Pr > F
Season	1	52.5199	52.5199	40.58	<.0001
Source	DF	Type III SS	Mean Square	F Value	Pr > F
Season	1	52.5199	52.5199	40.58	<.0001
The SAS System
The GLM Procedure
Dependent Variable: Delftia Delftia
Source	DF	Sum of Squares	Mean Square	F Value	Pr > F
Model	1	12.6569	12.6569	15.3	0.0005
Error	28	23.1695	0.827483
Corrected Total	29	35.8264
R-Square	Coeff Var	Root MSE	Delftia Mean
0.353283	-105.693	0.909661	-0.860664
Source	DF	Type I SS	Mean Square	F Value	Pr > F
Season	1	12.6569	12.6569	15.3	0.0005
Source	DF	Type III SS	Mean Square	F Value	Pr > F
Season	1	12.6569	12.6569	15.3	0.0005
The SAS System
The GLM Procedure
Dependent Variable: Lachnospiraceae Lachnospiraceae
Source	DF	Sum of Squares	Mean Square	F Value	Pr > F
Model	1	35.19	35.19	5.77	0.0232
Error	28	170.791	6.09967
Corrected Total	29	205.981
R-Square	Coeff Var	Root MSE	Lachnospiraceae Mean
0.170841	-116.982	2.46975	-2.11122
Source	DF	Type I SS	Mean Square	F Value	Pr > F
Season	1	35.19	35.19	5.77	0.0232
Source	DF	Type III SS	Mean Square	F Value	Pr > F
Season	1	35.19	35.19	5.77	0.0232
The SAS System
The GLM Procedure
Dependent Variable: Serratia Serratia
Source	DF	Sum of Squares	Mean Square	F Value	Pr > F
Model	1	11.7429	11.7429	10.1	0.0036
Error	28	32.5592	1.16283
Corrected Total	29	44.3022
R-Square	Coeff Var	Root MSE	Serratia Mean
0.265065	-34.0803	1.07835	-3.16413
Source	DF	Type I SS	Mean Square	F Value	Pr > F
Season	1	11.7429	11.7429	10.1	0.0036
Source	DF	Type III SS	Mean Square	F Value	Pr > F
Season	1	11.7429	11.7429	10.1	0.0036
The SAS System
The GLM Procedure
Dependent Variable: Other Other
Source	DF	Sum of Squares	Mean Square	F Value	Pr > F
Model	1	0.0206935	0.0206935	0.01	0.911
Error	28	45.5834	1.62798
Corrected Total	29	45.6041
R-Square	Coeff Var	Root MSE	Other Mean
0.000454	86.2935	1.27592	1.47859
Source	DF	Type I SS	Mean Square	F Value	Pr > F
Season	1	0.0206935	0.0206935	0.01	0.911
Source	DF	Type III SS	Mean Square	F Value	Pr > F
Season	1	0.0206935	0.0206935	0.01	0.911

## Sheet: WW-Midgut Abundance
Anderson and Maes 2021, Gut and Colony Microbiota of Honey Bees: Social Immunity and Opportunism Overwinter
Table S1, Experiment 2. Absolute abundance of the midgut microbiota from bee colonies (WW) overwintered outdoors in southern Arizona sampled in early and later winter. Values are 16S copy number.
Label	Group	16s Copy#	L. Firm5	L. Firm4	B. asteroides	S. alvi	G. apicola	Gilliamella spp.	P. apium	L. kunkeei	Enterobacteriaceae	Actinomycetales	Xanthomonadaceae	Delftia	Lachnospiraceae	Serratia	Diversity abundance
D801M	Early	108114	29254.4	7790.58	2543.86	16217.1	30844.3	158.991	317.983	1271.93	158.991	1748.91	5405.71	6359.66	0	0	6041.67
D802M	Early	1.91587e+06	1.28378e+06	2431.14	25428.5	21223.2	373673	65.7066	328.533	65.7066	197.12	262.826	459.946	854.186	191403	65.7066	15638.2
D803M	Early	136933	50789.9	16590.9	7381.37	2501.69	6446.67	13.7456	2707.88	123.71	54.9823	3257.7	2432.97	659.787	30460.2	68.7278	13443.2
D804M	Early	93701.9	21693.6	12669.8	4284.04	6289.33	12305.2	729.198	2005.29	820.347	1640.69	1458.4	3463.69	2278.74	546.898	364.599	23152
D842M	Early	607515	336518	1902.31	6255.93	12.7672	259711	0	1570.37	0	12.7672	76.6033	421.318	153.207	153.207	0	727.731
D843M	Early	170210	87009.2	12821.8	3506.9	1396.73	46755.3	40.1937	12249	170.823	10.0484	50.2421	653.147	673.244	0	783.776	4089.7
D844M	Early	189572	170355	5150.63	1674.16	392.505	8266.64	0	136.175	24.0309	0	0	1081.39	712.918	0	0	1778.29
D911M	Early	4.33906e+06	93264.4	26258.9	7243.83	7847.49	12676.7	301.826	1207.31	0	4.14136e+06	26560.7	3621.92	3320.09	301.826	0	15091.3
D913M	Early	73360.8	28551.2	1586.18	3833.27	4361.99	7666.53	0	12160.7	0	0	264.363	1586.18	1321.82	0	0	12028.5
D914M	Early	121945	12489.2	1262.95	5472.78	1262.95	11085.9	140.328	9121.29	50377.6	0	4069.5	1403.28	5613.1	561.31	1403.28	17681.3
D941M	Early	1.91084e+06	448019	986.391	25646.2	83054.1	1.18189e+06	394.556	51292.3	113040	197.278	197.278	1183.67	1380.95	0	0	3551.01
D942M	Early	141428	43370.5	4292.7	6066.54	35618.8	9773.87	0	16337.1	16461.3	124.169	319.292	1082.04	815.968	230.6	124.169	6811.56
D943M	Early	462478	1685	501.914	89.6276	430.212	322.659	0	3352.07	591.542	0	1918.03	573.616	627.393	430786	17.9255	21582.3
D944M	Early	1.02807e+06	14963.3	270.83	0	8531.13	106910	67.7074	137717	740854	67.7074	677.074	812.489	11442.6	338.537	338.537	5078.06
F801M	Late	1.86874e+06	12890.7	1074.22	469.972	2954.11	65930.3	12890.7	28198.3	1812.75	1.70318e+06	9063.74	67.1388	268.555	0	0	29943.9
F802M	Late	1.11831e+07	3.30564e+06	18515	296240	518421	2.60065e+06	27060.4	1.11375e+06	3.06637e+06	109666	8545.4	7121.16	5696.93	0	0	105393
F803M	Late	795314	34690.8	32418.5	4544.65	0	10301.2	84984.9	164516	757.442	255106	90893	605.953	7574.42	757.442	151.488	108011
F804M	Late	790468	11330.2	8850	2142.04	3494.9	12119.4	9977.38	579647	4453.18	1803.82	114881	732.802	3156.69	56.3694	0	37823.9
F841M	Late	3.02333e+08	1.04304e+06	93128.8	37251.5	0	7.28267e+06	1.69122e+07	353889	0	2.76592e+08	0	0	18625.8	0	0	0
F842M	Late	187945	21445.5	94.7392	8552.37	39308.2	14796.5	378.957	77117.7	18121	2506.28	456.471	327.281	430.633	94.7392	8.61266	4306.33
F843M	Late	624727	37099.4	885.426	218553	32908.3	290449	29.5142	35830.3	118.057	1210.08	442.713	2243.08	2892.39	0	0	2065.99
F844M	Late	5.69174e+06	14444.8	5575.17	253.417	506.833	1.64011e+06	1013.67	82867.3	51950.4	3.88158e+06	2027.33	0	1267.08	0	1520.5	8616.17
F911M	Late	710184	18470.3	2905.17	472.385	6495.3	87202.3	104539	55741.5	37224	291651	19344.2	23.6193	850.293	354.289	70.8578	84840.4
F912M	Late	618856	30051.5	571.322	399.925	3389.84	30222.9	115007	65892.4	120949	186079	18434.6	114.264	438.013	76.1762	38.0881	47191.2
F913M	Late	6.04775e+07	1.46736e+06	11387.5	35789.4	76459.1	1.56172e+06	1626.79	16267.9	0	5.71247e+07	130143	0	11387.5	0	0	40669.8
F914M	Late	1.8903e+06	13654.9	2299.04	1254.02	69.6678	898227	42009.7	40755.7	4180.07	113977	269684	69.6678	4946.41	66114.7	0	433055
F941M	Late	419101	57074.3	10238.8	2163.12	11408.5	71431	231406	2547.68	384.555	3300.76	2419.49	0	176.254	16.0231	336.485	26197.8
F942M	Late	906500	6824.29	869.336	304.268	21081.4	14344	239806	113970	14387.5	28905.4	241893	1738.67	4172.81	2868.81	0	215335
F943M	Late	5.5425e+06	71210.5	10726.3	2085.66	109348	1.83866e+06	3.41378e+06	35307.3	1042.83	6405.97	12216	148.976	595.904	0	0	40968.4
F944M	Late	8.73176e+06	728752	305147	95240	154469	3.08796e+06	104243	185742	117510	2.28529e+06	105190	3316.82	16584.1	0	3790.65	1.53853e+06

## Sheet: CW-Midgut Analysis
Anderson and Maes 2021, Gut and Colony Microbiota of Honey Bees: Social Immunity and Opportunism Overwinter
Table S1, Experiment 2. Manova and Wilcoxon results comparing relative and absolute abundance of bacteria in the midgut of cold winter indoor samples in early and late winter
MANOVA Test Criteria and Exact F Statistics for the Hypothesis of No Overall Season Effect								The SAS System
H = Type III SSCP Matrix for Season
E = Error SSCP Matrix								The GLM Procedure
S=1 M=6 N=7.5								Class Level Information
Statistic	Value	F Value	Num DF	Den DF	Pr > F			Class	Levels	Values
Wilks' Lambda	0.259655	3.46	14	17	0.0085			Season	2	Post-overwintering Pre-overwinter
Pillai's Trace	0.740345	3.46	14	17	0.0085
Hotelling-Lawley Trace	2.85127	3.46	14	17	0.0085			Number of Observations Read	32
Roy's Greatest Root	2.85127	3.46	14	17	0.0085			Number of Observations Used	32
The SAS System
										MANOVA on centered log ratios											Wilcoxon on OTU cell number
The GLM Procedure
Dependent Variable: Firm5 Firm5
Source	DF	Sum of Squares	Mean Square	F Value	Pr > F
Model	1	8.7504	8.7504	7.18	0.0118
Error	30	36.5462	1.21821
Corrected Total	31	45.2966
R-Square	Coeff Var	Root MSE	Firm5 Mean
0.19318	46.5636	1.10372	2.37036
Source	DF	Type I SS	Mean Square	F Value	Pr > F
Season	1	8.7504	8.7504	7.18	0.0118
Source	DF	Type III SS	Mean Square	F Value	Pr > F
Season	1	8.7504	8.7504	7.18	0.0118
The SAS System
The GLM Procedure
Dependent Variable: Firm4 Firm4
Source	DF	Sum of Squares	Mean Square	F Value	Pr > F
Model	1	19.1131	19.1131	11.1	0.0023
Error	30	51.6426	1.72142
Corrected Total	31	70.7558
R-Square	Coeff Var	Root MSE	Firm4 Mean
0.270128	139.153	1.31203	0.942868
Source	DF	Type I SS	Mean Square	F Value	Pr > F
Season	1	19.1131	19.1131	11.1	0.0023
Source	DF	Type III SS	Mean Square	F Value	Pr > F
Season	1	19.1131	19.1131	11.1	0.0023
The SAS System
The GLM Procedure
Dependent Variable: B__asteroides B# asteroides
Source	DF	Sum of Squares	Mean Square	F Value	Pr > F
Model	1	6.00023	6.00023	3.25	0.0814
Error	30	55.3615	1.84538
Corrected Total	31	61.3618
R-Square	Coeff Var	Root MSE	B__asteroides Mean
0.097785	-428.996	1.35845	-0.316658
Source	DF	Type I SS	Mean Square	F Value	Pr > F
Season	1	6.00023	6.00023	3.25	0.0814
Source	DF	Type III SS	Mean Square	F Value	Pr > F
Season	1	6.00023	6.00023	3.25	0.0814
The SAS System
The GLM Procedure
Dependent Variable: S__alvi S# alvi
Source	DF	Sum of Squares	Mean Square	F Value	Pr > F
Model	1	9.30228	9.30228	2.06	0.1614
Error	30	135.339	4.51131
Corrected Total	31	144.642
R-Square	Coeff Var	Root MSE	S__alvi Mean
0.064313	1028.09	2.12398	0.206596
Source	DF	Type I SS	Mean Square	F Value	Pr > F
Season	1	9.30228	9.30228	2.06	0.1614
Source	DF	Type III SS	Mean Square	F Value	Pr > F
Season	1	9.30228	9.30228	2.06	0.1614
The SAS System
The GLM Procedure
Dependent Variable: G__apicola G# apicola
Source	DF	Sum of Squares	Mean Square	F Value	Pr > F
Model	1	6.6707	6.6707	1.64	0.21
Error	30	121.951	4.06503
Corrected Total	31	128.622
R-Square	Coeff Var	Root MSE	G__apicola Mean
0.051863	80.082	2.01619	2.51766
Source	DF	Type I SS	Mean Square	F Value	Pr > F
Season	1	6.6707	6.6707	1.64	0.21
Source	DF	Type III SS	Mean Square	F Value	Pr > F
Season	1	6.6707	6.6707	1.64	0.21
The SAS System
The GLM Procedure
Dependent Variable: G__apicola__2_ G# apicola (2)
Source	DF	Sum of Squares	Mean Square	F Value	Pr > F
Model	1	0.00010011	0.00010011	0	0.9911
Error	30	23.6002	0.786675
Corrected Total	31	23.6003
R-Square	Coeff Var	Root MSE	G__apicola__2_ Mean
4e-06	-29.1288	0.886947	-3.04492
Source	DF	Type I SS	Mean Square	F Value	Pr > F
Season	1	0.00010011	0.00010011	0	0.9911
Source	DF	Type III SS	Mean Square	F Value	Pr > F
Season	1	0.00010011	0.00010011	0	0.9911
The SAS System
The GLM Procedure
Dependent Variable: P__apium P# apium
Source	DF	Sum of Squares	Mean Square	F Value	Pr > F
Model	1	2.25496	2.25496	0.47	0.4978
Error	30	143.656	4.78855
Corrected Total	31	145.911
R-Square	Coeff Var	Root MSE	P__apium Mean
0.015454	268.827	2.18827	0.81401
Source	DF	Type I SS	Mean Square	F Value	Pr > F
Season	1	2.25496	2.25496	0.47	0.4978
Source	DF	Type III SS	Mean Square	F Value	Pr > F
Season	1	2.25496	2.25496	0.47	0.4978
The SAS System
The GLM Procedure
Dependent Variable: L__kunkeei L# kunkeei
Source	DF	Sum of Squares	Mean Square	F Value	Pr > F
Model	1	16.2825	16.2825	12.37	0.0014
Error	30	39.484	1.31613
Corrected Total	31	55.7665
R-Square	Coeff Var	Root MSE	L__kunkeei Mean
0.291977	-52.5798	1.14723	-2.18188
Source	DF	Type I SS	Mean Square	F Value	Pr > F
Season	1	16.2825	16.2825	12.37	0.0014
Source	DF	Type III SS	Mean Square	F Value	Pr > F
Season	1	16.2825	16.2825	12.37	0.0014
The SAS System
The GLM Procedure
Dependent Variable: Enterobacteriaceae Enterobacteriaceae
Source	DF	Sum of Squares	Mean Square	F Value	Pr > F
Model	1	4.27155	4.27155	2.85	0.1019
Error	30	44.999	1.49997
Corrected Total	31	49.2705
R-Square	Coeff Var	Root MSE	Enterobacteriaceae Mean
0.086696	-46.8082	1.22473	-2.61649
Source	DF	Type I SS	Mean Square	F Value	Pr > F
Season	1	4.27155	4.27155	2.85	0.1019
Source	DF	Type III SS	Mean Square	F Value	Pr > F
Season	1	4.27155	4.27155	2.85	0.1019
The SAS System
The GLM Procedure
Dependent Variable: Actinomycetales Actinomycetales
Source	DF	Sum of Squares	Mean Square	F Value	Pr > F
Model	1	0.736041	0.736041	0.17	0.6844
Error	30	131.098	4.36993
Corrected Total	31	131.834
R-Square	Coeff Var	Root MSE	Actinomycetales Mean
0.005583	160.968	2.09044	1.29866
Source	DF	Type I SS	Mean Square	F Value	Pr > F
Season	1	0.736041	0.736041	0.17	0.6844
Source	DF	Type III SS	Mean Square	F Value	Pr > F
Season	1	0.736041	0.736041	0.17	0.6844
The SAS System
The GLM Procedure
Dependent Variable: Xanthomonadaceae Xanthomonadaceae
Source	DF	Sum of Squares	Mean Square	F Value	Pr > F
Model	1	1.35855	1.35855	1	0.3246
Error	30	40.6331	1.35444
Corrected Total	31	41.9917
R-Square	Coeff Var	Root MSE	Xanthomonadaceae Mean
0.032353	750.846	1.1638	0.154999
Source	DF	Type I SS	Mean Square	F Value	Pr > F
Season	1	1.35855	1.35855	1	0.3246
Source	DF	Type III SS	Mean Square	F Value	Pr > F
Season	1	1.35855	1.35855	1	0.3246
The SAS System
The GLM Procedure
Dependent Variable: Delftia Delftia
Source	DF	Sum of Squares	Mean Square	F Value	Pr > F
Model	1	0.168485	0.168485	0.17	0.6798
Error	30	29.0977	0.969923
Corrected Total	31	29.2662
R-Square	Coeff Var	Root MSE	Delftia Mean
0.005757	153.71	0.984847	0.640717
Source	DF	Type I SS	Mean Square	F Value	Pr > F
Season	1	0.168485	0.168485	0.17	0.6798
Source	DF	Type III SS	Mean Square	F Value	Pr > F
Season	1	0.168485	0.168485	0.17	0.6798
The SAS System
The GLM Procedure
Dependent Variable: Lachnospiraceae Lachnospiraceae
Source	DF	Sum of Squares	Mean Square	F Value	Pr > F
Model	1	25.7962	25.7962	10.19	0.0033
Error	30	75.9804	2.53268
Corrected Total	31	101.777
R-Square	Coeff Var	Root MSE	Lachnospiraceae Mean
0.253459	-128.321	1.59144	-1.24021
Source	DF	Type I SS	Mean Square	F Value	Pr > F
Season	1	25.7962	25.7962	10.19	0.0033
Source	DF	Type III SS	Mean Square	F Value	Pr > F
Season	1	25.7962	25.7962	10.19	0.0033
The SAS System
The GLM Procedure
Dependent Variable: Serratia Serratia
Source	DF	Sum of Squares	Mean Square	F Value	Pr > F
Model	1	0.0511676	0.0511676	0.05	0.8307
Error	30	33.0018	1.10006
Corrected Total	31	33.053
R-Square	Coeff Var	Root MSE	Serratia Mean
0.001548	-38.0273	1.04884	-2.75811
Source	DF	Type I SS	Mean Square	F Value	Pr > F
Season	1	0.0511676	0.0511676	0.05	0.8307
Source	DF	Type III SS	Mean Square	F Value	Pr > F
Season	1	0.0511676	0.0511676	0.05	0.8307
The SAS System
The GLM Procedure
Dependent Variable: Other Other
Source	DF	Sum of Squares	Mean Square	F Value	Pr > F
Model	1	5.05238	5.05238	7.48	0.0104
Error	30	20.2663	0.675543
Corrected Total	31	25.3187
R-Square	Coeff Var	Root MSE	Other Mean
0.199552	25.5858	0.821914	3.21239
Source	DF	Type I SS	Mean Square	F Value	Pr > F
Season	1	5.05238	5.05238	7.48	0.0104
Source	DF	Type III SS	Mean Square	F Value	Pr > F
Season	1	5.05238	5.05238	7.48	0.0104

## Sheet: CW-Midgut Abundance
Anderson and Maes 2021, Gut and Colony Microbiota of Honey Bees: Social Immunity and Opportunism Overwinter
Table S1, Experiment 2. Absolute abundance of the midgut microbiota from bee colonies overwintered indoors at 7 C and 25% relative humidity sampled in early and later winter. Values are 16S copy number.
Label	Group	16s Copy#	L. Firm5	L. Firm4	B. asteroides	S. alvi	G. apicola	Gilliamella spp.	P. apium	L. kunkeei	Enterobacteriaceae	Actinomycetales	Xanthomonadaceae	Delftia	Lachnospiraceae	Serratia	Diversity abundance
OR181M	Early	114861	1768.45	707.381	353.691	1591.61	2210.57	0	88.4227	442.113	0	9284.38	2387.41	5570.63	0	0	90456.4
OR182M	Early	1.04688e+06	25813.6	1434.09	0	0	119029	0	37286.3	0	0	239493	11472.7	1434.09	0	0	610922
OR183M	Early	14700.7	1242.67	22.0175	7.92632	7.92632	18.4947	0	73.0982	22.8982	0	6142.01	71.3368	111.849	22.8982	1.7614	6955.78
OR184M	Early	22961.7	3512.56	4839.52	173.46	212.488	880.307	4.33649	78.0568	0	0	3048.55	229.834	195.142	3356.44	0	6431.01
OR31M	Early	390886	4587.89	239.89	4138.1	13493.8	362054	0	869.601	134.938	89.9587	344.842	524.759	884.594	29.9862	0	3493.4
OR32M	Early	12917	169.798	87.9679	57.2814	63.4187	73.6475	4.09153	372.329	245.492	2.04576	3727.38	546.219	229.126	736.475	12.2746	6589.41
OR33M	Early	97343.9	5872.74	4425.78	586.502	574.927	2755.02	0	53310	73.3128	7744.14	366.564	470.745	439.877	1512.56	3.85857	19207.9
OR34M	Early	49595.8	629.897	96.9073	34.6097	3.46097	89.9853	0	18495.4	51.9146	24.2268	6267.82	124.595	186.893	1083.28	207.658	22299.1
OY11M	Early	6232.79	33.3733	5.33972	6.67465	6.00719	8.67705	0	5207.56	44.0527	0	138.165	134.828	60.0719	0	0	588.037
OY12M	Early	128595	8188.85	5610.88	151.645	0	8643.78	0	2274.68	0	303.291	1819.74	8340.49	19107.3	0	0	74154.5
OY13M	Early	39366.4	1888.14	206.919	77.5947	1008.73	17484.7	77.5947	3465.9	0	25.8649	129.325	232.784	1551.89	206.919	0	13010
OY14M	Early	29851	2105.15	1199.93	84.2059	231.566	1431.5	0	5704.95	442.081	21.0515	378.927	399.978	1368.35	2841.95	0	13641.4
OY131M	Early	18155	110.847	4.45617	2.22809	45.1187	17408.6	0	6.68426	1.67106	2.78511	5.57021	0	7.7983	26.18	0	533.07
OY132M	Early	47062.8	5285.13	425.908	58.0783	5052.81	3852.53	0	464.626	212.954	0	3329.82	1045.41	3504.06	2168.26	0	21663.2
OY133M	Early	142703	24590.7	8325.98	5615.19	0	74546.5	0	193.627	0	0	0	9100.49	5034.31	0	0	15296.6
OY134M	Early	23084.3	8131.77	402.165	474.554	321.732	7745.69	8.04329	80.4329	0	0	128.693	619.334	458.468	120.649	0	4592.72
FR181M	Late	410190	194225	14547.5	0	39106.6	106940	0	4372.42	40.8637	0	22066.4	490.364	449.501	40.8637	653.819	27256.1
FR182M	Late	220978	19808.5	17181.1	1942.01	0	2307.56	0	5254.85	22.8472	0	70574.9	388.402	1005.28	411.249	708.262	101373
FR183M	Late	83755.8	20938.9	8036.03	264.095	0	35464.2	0	5545.99	0	0	7771.93	1584.57	943.196	0	0	3206.87
FR184M	Late	27610.2	2077.76	1598.28	1118.79	3236.51	4315.34	0	0	0	0	7312.11	1318.58	1877.97	119.871	0	4635
FR31M	Late	67419.2	1834.88	622.849	50.5013	134.67	5268.97	0	45148.2	0	16.8338	1430.87	2087.39	1851.71	0	0	8972.4
FR32M	Late	72951.7	17874.1	26.4605	211.684	833.506	35007.3	26.4605	145.533	0	0	7448.64	793.816	767.355	0	0	9816.85
FR33M	Late	22024.2	7476.45	3241.02	810.255	552.447	2541.25	0	478.787	36.8298	36.8298	1252.21	1436.36	1289.04	220.979	0	2651.74
FR34M	Late	23160.7	2106.36	1025.22	214.364	37.2807	344.847	0	9870.07	0	0	6132.68	326.206	838.816	0	0	2264.8
FY11M	Late	3400.63	414.864	213.718	37.7149	6.28581	873.728	0	0	0	0	25.1433	62.8581	270.29	6.28581	0	1489.74
FY12M	Late	581539	217757	73991.5	23873.6	154075	57313.1	0	43060.6	0	0	27.5676	468.649	1240.54	0	0	9731.37
FY13M	Late	2953.05	211.602	55.7365	35.5135	120.351	1554.7	0.493244	13.3176	0	0.493244	283.615	8.87839	28.1149	7.39865	0	632.832
FY14M	Late	14124.6	1694.95	916.942	157.455	583.508	1370.78	0	722.439	0	0	4890.36	92.6204	342.695	55.5722	0	3297.29
FY131M	Late	393266	95973.4	26375.3	8569.7	120341	129759	0	200.781	0	0	73.0113	155.149	109.517	0	9.12641	11700.1
FY132M	Late	92879.7	7016.62	3813.87	384.783	4221.29	58735.9	0	1086.45	0	0	6314.96	373.465	701.662	543.223	0	9687.47
FY133M	Late	1.60092e+06	346867	186774	66705.1	106728	186774	0	0	0	6670.51	6670.51	0	193445	0	0	500288
FY134M	Late	126120	10694.4	10571.5	2950.18	2827.25	26920.4	0	368.772	860.468	0	5531.58	4671.11	5654.51	0	0	55070
